# Supplementary material for: Metallophilicity-assisted assembly of phosphine-based cage molecules
Source: Royal Society of Chemistry journal article supplement (doi:10.1039/c3dt53645a), 2014-01-01
Supplement: c3dt53645a1.pdf [file c3dt53645a1.pdf]

## Supporting Information

### Metallophilicity-assisted assembly of phosphine-based cage molecules

*Julia R. Shakirova,<sup>†</sup> Antti J. Karttunen,<sup>§</sup> Elena V. Grachova,<sup>†</sup> Vladislav V. Gurzhiy,<sup>†</sup> Sergey P. Tunik<sup>†</sup> and Igor O. Koshevoy,<sup>\*,#</sup>*

<sup>†</sup> Department of Chemistry, St.-Petersburg State University, Universitetskii pr. 26, 198504, St.-Petersburg, Russia;

<sup>§</sup> Department of Chemistry, University of Jyväskylä, Jyväskylä, 40014, Finland

<sup>#</sup> Department of Chemistry, University of Eastern Finland, Joensuu, 80101, Finland

E-mail: [igor.koshevoy@uef.fi](mailto:igor.koshevoy@uef.fi), [stunik@inbox.ru](mailto:stunik@inbox.ru)

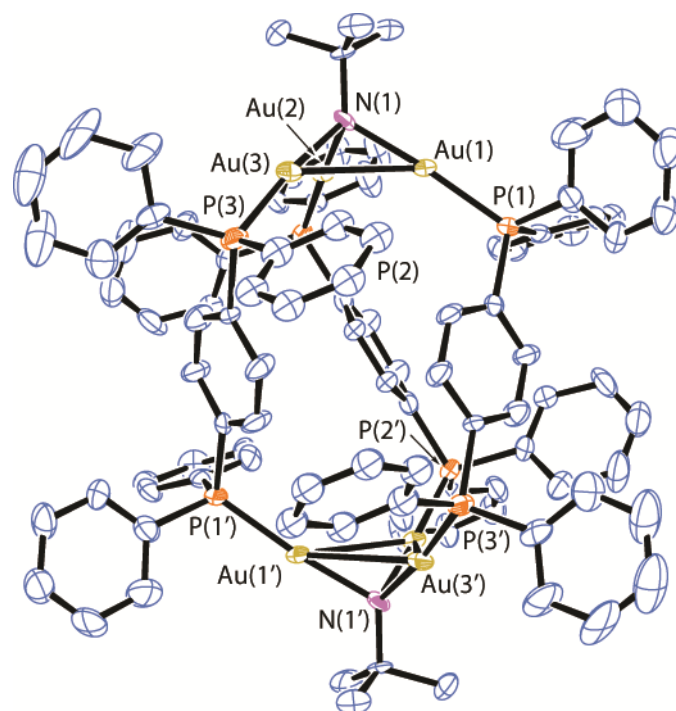

**Figure S1.** ORTEP view of the dication **1** (counterions and hydrogen atoms are omitted for clarity; ellipsoids are shown at 50% probability).

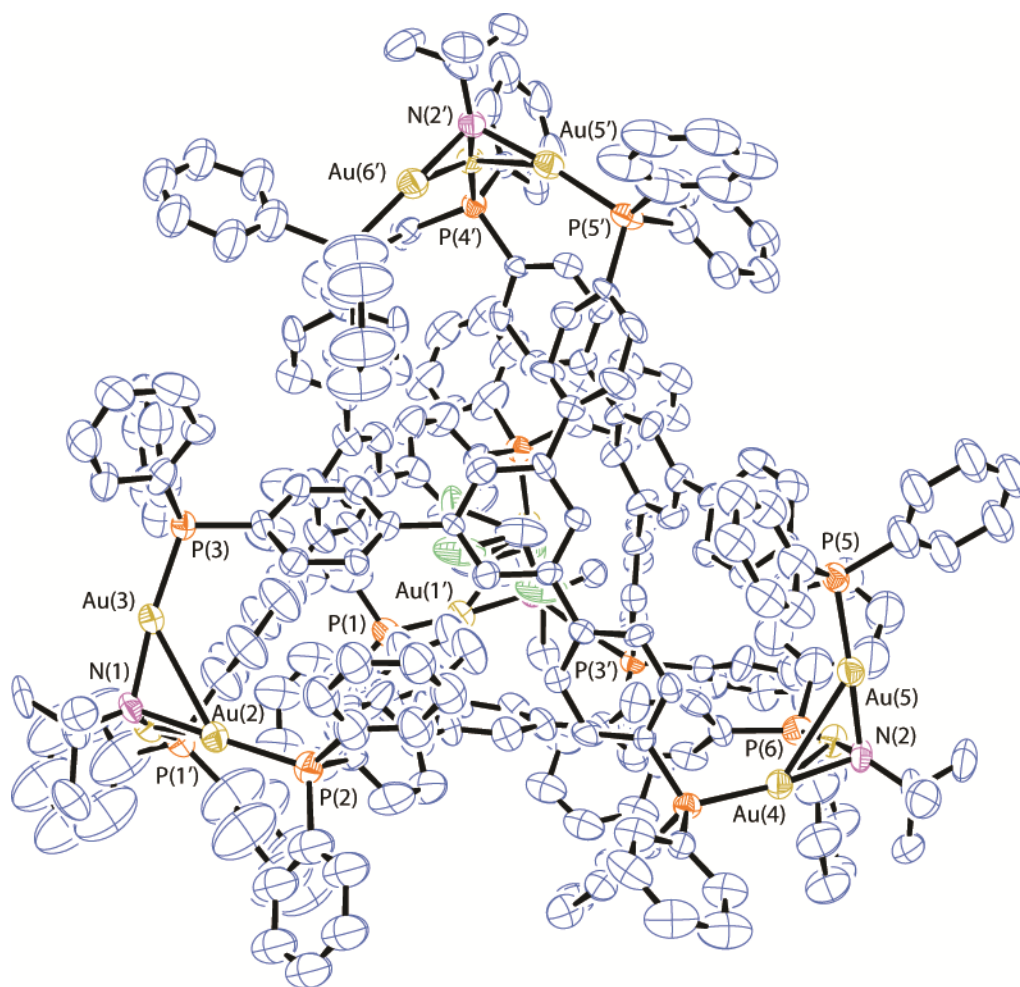

**Figure S2.** ORTEP view of the tetracation **4** (counterions and hydrogen atoms are omitted for clarity; ellipsoids are shown at 50% probability).

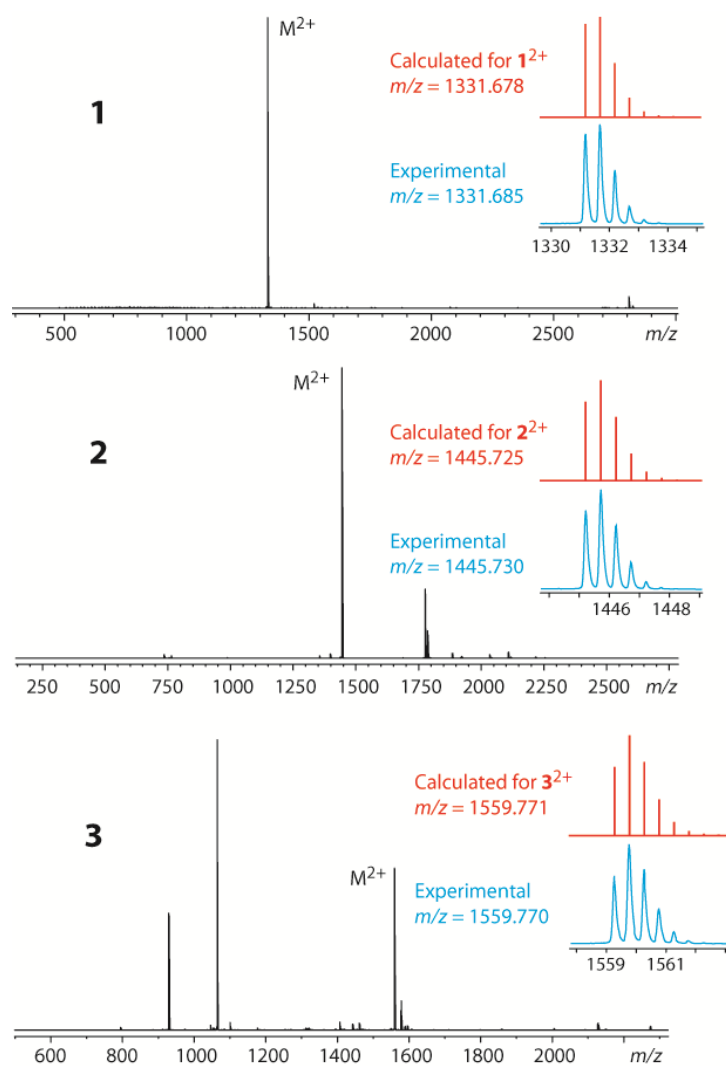

Figure S3. ESI-MS spectra of 1–3.

### Optimized cartesian coordinates of the studied systems in atomic units (DFT-PBE0-D)

#### $[(\mu_3\text{-Bu}^t\text{NAu}_3)_2(\text{PPh}_2\text{C}_6\text{H}_4\text{PPh}_2)_3]^{2+}$ (1)

|                   |                   |                   |    |
|-------------------|-------------------|-------------------|----|
| 0.000000000000000 | 0.000000000000000 | -9.82742676468305 | n  |
| 0.19308093169600  | -3.36802652485621 | -7.86560404903517 | au |
| -3.01333699699329 | 1.51680027059306  | -7.86560404903517 | au |
| 2.82025606529735  | 1.85122625426318  | -7.86560404903517 | au |
| 0.000000000000000 | 0.000000000000000 | 9.82742676468305  | n  |
| 0.19308093169600  | 3.36802652485621  | 7.86560404903517  | au |
| -3.01333699699329 | -1.51680027059306 | 7.86560404903517  | au |
| 2.82025606529735  | -1.85122625426318 | 7.86560404903517  | au |
| -6.14367655317532 | 2.98028787061925  | -5.32613418994343 | p  |
| 5.65284328313454  | 3.83043603237504  | -5.32613418994343 | p  |
| 0.49083327004084  | -6.81072390299423 | -5.32613418994343 | p  |
| 0.49083327004084  | 6.81072390299423  | 5.32613418994343  | p  |
| -6.14367655317532 | -2.98028787061925 | 5.32613418994343  | p  |
| 5.65284328313454  | -3.83043603237505 | 5.32613418994343  | p  |
| 4.20311935889617  | 4.51254144180280  | -2.26189516573891 | c  |
| 1.88959845448702  | 5.79850842792380  | -2.29731634745683 | c  |
| 5.27779577073043  | 3.84783912464568  | 0.05989463760073  | c  |
| 0.69342854625355  | 6.49462477576150  | -0.05989463760073 | c  |
| 1.01168568582539  | 6.28293211988238  | -4.10425927747298 | h  |
| 4.07685637539668  | 4.53569447849944  | 2.29731634745683  | c  |
| 7.05865162496228  | 2.80064109872152  | 0.14632160610880  | h  |
| 1.80641584478323  | 5.89627886084364  | 2.26189516573891  | c  |

|                    |                    |                    |   |
|--------------------|--------------------|--------------------|---|
| -1.10389947410554  | 7.51329217304244   | -0.14632160610880  | h |
| 4.93533598315872   | 4.01761156451099   | 4.10425927747298   | h |
| 1.80641584478323   | -5.89627886084364  | -2.26189516573891  | c |
| 4.07685637539668   | -4.53569447849944  | -2.29731634745683  | c |
| 0.69342854625355   | -6.49462477576150  | 0.05989463760073   | c |
| 5.27779577073043   | -3.84783912464568  | -0.05989463760073  | c |
| 4.93533598315872   | -4.01761156451099  | -4.10425927747298  | h |
| 1.88959845448702   | -5.79850842792380  | 2.29731634745683   | c |
| -1.10389947410554  | -7.51329217304244  | 0.14632160610880   | h |
| 4.20311935889617   | -4.51254144180280  | 2.26189516573891   | c |
| 7.05865162496228   | -2.80064109872152  | -0.14632160610880  | h |
| 1.01168568582539   | -6.28293211988238  | 4.10425927747298   | h |
| -6.00953520367938  | 1.38373741904082   | -2.26189516573891  | c |
| -5.96645482988369  | -1.26281394942436  | -2.29731634745683  | c |
| -5.97122431698399  | 2.64678565111582   | 0.05989463760073   | c |
| -5.97122431698399  | -2.64678565111582  | -0.05989463760073  | c |
| -5.94702166898412  | -2.26532055537142  | -4.10425927747298  | h |
| -5.96645482988369  | 1.26281394942436   | 2.29731634745683   | c |
| -5.95475215085674  | 4.71265107432093   | 0.14632160610880   | h |
| -6.00953520367938  | -1.38373741904082  | 2.26189516573891   | c |
| -5.95475215085674  | -4.71265107432093  | -0.14632160610880  | h |
| -5.94702166898412  | 2.26532055537142   | 4.10425927747298   | h |
| 0.00000000000000   | 0.00000000000000   | -12.62782483207197 | c |
| 0.00000000000000   | 0.00000000000000   | 12.62782483207197  | c |
| -2.29998727230344  | -1.46361267185569  | -13.60609626001240 | c |
| -4.07392102436555  | -0.58117785093615  | -12.94527299268291 | h |
| -2.33054759299840  | -1.50436263978632  | -15.69118382628462 | h |
| -2.27046555178660  | -3.43386882383815  | -12.91425402002027 | h |
| 2.41751939127957   | -1.26004107026775  | -13.60609626001240 | c |
| 2.46809005905835   | -1.26613210037213  | -15.69118382628462 | h |
| 4.10905041060052   | -0.24934643434554  | -12.91425402002027 | h |
| 2.54027529521032   | -3.23753017464400  | -12.94527299268291 | h |
| -0.11753211897620  | 2.72365374212352   | -13.60609626001240 | c |
| -0.13754246606004  | 2.77049474015847   | -15.69118382628462 | h |
| -1.83858485881391  | 3.68321525818375   | -12.91425402002027 | h |
| 1.53364572915519   | 3.81870802558018   | -12.94527299268291 | h |
| -0.11753211897620  | -2.72365374212352  | 13.60609626001240  | c |
| -0.13754246606004  | -2.77049474015847  | 15.69118382628462  | h |
| -1.83858485881391  | -3.68321525818375  | 12.91425402002027  | h |
| 1.53364572915519   | -3.81870802558018  | 12.94527299268291  | h |
| 2.41751939127957   | 1.26004107026774   | 13.60609626001240  | c |
| 2.54027529521032   | 3.23753017464400   | 12.94527299268291  | h |
| 2.46809005905835   | 1.26613210037213   | 15.69118382628462  | h |
| 4.10905041060052   | 0.24934643434554   | 12.91425402002027  | h |
| -2.29998727230344  | 1.46361267185569   | 13.60609626001240  | c |
| -2.33054759299840  | 1.50436263978632   | 15.69118382628462  | h |
| -2.27046555178660  | 3.43386882383815   | 12.91425402002027  | h |
| -4.07392102436555  | 0.58117785093615   | 12.94527299268291  | h |
| -6.07439978278463  | 6.36086544982567   | -4.68323059802181  | c |
| -8.10056186339087  | 7.56477448219189   | -3.47153830922189  | c |
| -3.98226537332762  | 7.78555017928262   | -5.45455693616905  | c |
| -8.00368399828466  | 10.15133925479057  | -2.99981870802353  | c |
| -9.77621459527331  | 6.48477088908643   | -2.91935152936490  | h |
| -3.88894837961132  | 10.37536102281656  | -4.97300330163251  | c |
| -2.44365490454439  | 6.86435244947616   | -6.48671955974092  | h |
| -5.89642564944392  | 11.55624931068822  | -3.74124901061249  | c |
| -9.59516856780871  | 11.08287893280419  | -2.06664924965841  | h |
| -2.25518303342110  | 11.47805737259774  | -5.59640637505861  | h |
| -5.83737060626615  | 13.59239448114407  | -3.38718937801215  | h |
| -9.32318747215080  | 2.32162483335304   | -6.46959862144641  | c |
| -9.77874852075557  | 2.53398981209956   | -9.06987226390424  | c |
| -11.30716184165002 | 1.68670457744093   | -4.83556056757527  | c |
| -12.20104304741820 | 2.13751242358839   | -10.02158288982422 | c |
| -8.22646381809536  | 3.00466326817646   | -10.35649641752458 | h |
| -13.72608843886674 | 1.28534019783465   | -5.79955713231092  | c |
| -10.96370495738167 | 1.48788806386528   | -2.80487672611179  | h |
| -14.17534701269808 | 1.51407500802683   | -8.38767023266414  | c |
| -12.54736550345551 | 2.30598393458056   | -12.05218123982871 | h |
| -15.27280044636366 | 0.78860345237134   | -4.52101543529682  | h |
| -16.07502065033562 | 1.19599640432656   | -9.13833419592855  | h |
| -6.07439978278463  | -6.36086544982567  | 4.68323059802181   | c |
| -8.10056186339087  | -7.56477448219189  | 3.47153830922189   | c |
| -3.98226537332762  | -7.78555017928262  | 5.45455693616905   | c |
| -8.00368399828466  | -10.15133925479057 | 2.99981870802353   | c |
| -9.77621459527331  | -6.48477088908643  | 2.91935152936490   | h |
| -3.88894837961132  | -10.37536102281656 | 4.97300330163251   | c |
| -2.44365490454439  | -6.86435244947616  | 6.48671955974092   | h |

|                    |                    |                    |   |
|--------------------|--------------------|--------------------|---|
| -5.89642564944392  | -11.55624931068822 | 3.74124901061249   | c |
| -9.59516856780871  | -11.08287893280419 | 2.06664924965841   | h |
| -2.25518303342110  | -11.47805737259774 | 5.59640637505861   | h |
| -5.83737060626615  | -13.59239448114407 | 3.38718937801215   | h |
| -9.32318747215080  | -2.32162483335304  | 6.46959862144641   | c |
| -9.77874852075557  | -2.53398981209956  | 9.06987226390424   | c |
| -11.30716184165002 | -1.68670457744093  | 4.83556056757527   | c |
| -12.20104304741820 | -2.13751242358839  | 10.02158288982422  | c |
| -8.22646381809536  | -3.00466326817646  | 10.35649641752458  | h |
| -13.72608843886673 | -1.28534019783465  | 5.79955713231092   | c |
| -10.96370495738167 | -1.48788806386528  | 2.80487672611179   | h |
| -14.17534701269808 | -1.51407500802683  | 8.38767023266414   | c |
| -12.54736550345551 | -2.30598393458056  | 12.05218123982871  | h |
| -15.27280044636366 | -0.78860345237134  | 4.52101543529682   | h |
| -16.07502065033562 | -1.19599640432656  | 9.13833419592855   | h |
| 6.67217981981591   | -6.91330477845090  | 6.46959862144641   | c |
| 7.08387381058691   | -7.20164973014404  | 9.06987226390424   | c |
| 7.11430993356824   | -8.94893711085047  | 4.83556056757527   | c |
| 7.95166158344148   | -9.49765701993750  | 10.02158288982422  | h |
| 6.71534662910647   | -5.62199501569594  | 10.35649641752458  | h |
| 7.97618148326349   | -11.24447118373312 | 5.79955713231092   | c |
| 6.77040133998590   | -8.75090298075728  | 2.80487672611179   | h |
| 8.39890092653538   | -11.51917311644292 | 8.38767023266414   | c |
| 8.27072341979330   | -9.71334530927080  | 12.05218123982871  | h |
| 8.31935084644748   | -12.83233144729560 | 4.52101543529682   | h |
| 9.07327359414948   | -13.32337804738673 | 9.13833419592855   | h |
| 8.54587096099602   | -2.08015179972128  | 4.68323059802181   | c |
| 10.60156780717386  | -3.23290511752803  | 3.47153830922189   | c |
| 8.73361692436104   | 0.44403211172843   | 5.45455693616905   | c |
| 12.79315967622518  | -1.85572403898222  | 2.99981870802353   | c |
| 10.50408362530728  | -5.22406474781168  | 2.91935152936490   | h |
| 10.92980040899970  | 1.81975242065857   | 4.97300330163251   | c |
| 7.16653105404850   | 1.31590899932017   | 6.48671955974092   | h |
| 12.95621830024434  | 0.67167025139953   | 3.74124901061249   | c |
| 14.39563898678010  | -2.76822026691417  | 2.06664924965841   | h |
| 11.06788078747547  | 3.78598288917259   | 5.59640637505861   | h |
| 14.69004422206325  | 1.74088600424096   | 3.38718937801215   | h |
| -2.47147117821143  | -8.44101724954696  | -4.68323059802181  | c |
| -2.50100594378299  | -10.79767959971989 | -3.47153830922189  | c |
| -4.75135155103343  | -7.34151806755416  | -5.45455693616905  | c |
| -4.78947567794054  | -12.00706329377280 | -2.99981870802353  | c |
| -0.72786903003405  | -11.70883563689808 | -2.91935152936490  | h |
| -7.04085202938835  | -8.55560860215803  | -4.97300330163251  | c |
| -4.72287614950409  | -5.54844345015595  | -6.48671955974092  | h |
| -7.05979265080044  | -10.88457905928867 | -3.74124901061249  | c |
| -4.80047041897141  | -13.85109919971834 | -2.06664924965841  | h |
| -8.81269775405440  | -7.69207448342517  | -5.59640637505861  | h |
| -8.85267361579706  | -11.85150847690313 | -3.38718937801215  | h |
| 2.65100765233486   | -9.23492961180384  | -6.46959862144641  | c |
| 2.69487471016863   | -9.73563954224360  | -9.06987226390424  | c |
| 4.19285190808173   | -10.63564168829137 | -4.83556056757527  | c |
| 4.24938146397676   | -11.63516944352587 | -10.02158288982422 | c |
| 1.51111718898891   | -8.62665828387230  | -10.35649641752458 | h |
| 5.74990695560324   | -12.52981138156782 | -5.79955713231092  | c |
| 4.19330361739582   | -10.23879104462266 | -2.80487672611179  | h |
| 5.77644608616272   | -13.03324812446975 | -8.38767023266414  | c |
| 4.27664208366224   | -12.01932924385129 | -12.05218123982871 | h |
| 6.95344959991617   | -13.62093489966694 | -4.52101543529682  | h |
| 7.00174705618605   | -14.51937445171338 | -9.13833419592855  | h |
| 6.67217981981591   | 6.91330477845090   | -6.46959862144641  | c |
| 7.08387381058691   | 7.20164973014404   | -9.06987226390424  | c |
| 7.11430993356824   | 8.94893711085047   | -4.83556056757527  | c |
| 7.95166158344148   | 9.49765701993750   | -10.02158288982422 | c |
| 6.71534662910647   | 5.62199501569594   | -10.35649641752458 | h |
| 7.97618148326349   | 11.24447118373312  | -5.79955713231092  | c |
| 6.77040133998590   | 8.75090298075728   | -2.80487672611179  | h |
| 8.39890092653538   | 11.51917311644292  | -8.38767023266414  | c |
| 8.27072341979330   | 9.71334530927080   | -12.05218123982871 | h |
| 8.31935084644748   | 12.83233144729560  | -4.52101543529682  | h |
| 9.07327359414948   | 13.32337804738673  | -9.13833419592855  | h |
| 8.54587096099602   | 2.08015179972128   | -4.68323059802181  | c |
| 10.60156780717386  | 3.23290511752803   | -3.47153830922189  | c |
| 8.73361692436104   | -0.44403211172843  | -5.45455693616905  | c |
| 12.79315967622518  | 1.85572403898222   | -2.99981870802353  | c |
| 10.50408362530728  | 5.22406474781168   | -2.91935152936490  | h |
| 10.92980040899970  | -1.81975242065857  | -4.97300330163251  | c |
| 7.16653105404850   | -1.31590899932017  | -6.48671955974092  | h |

|                   |                   |                   |   |
|-------------------|-------------------|-------------------|---|
| 12.95621830024434 | -0.67167025139953 | -3.74124901061249 | c |
| 14.39563898678010 | 2.76822026691417  | -2.06664924965841 | h |
| 11.06788078747547 | -3.78598288917259 | -5.59640637505861 | h |
| 14.69004422206325 | -1.74088600424096 | -3.38718937801215 | h |
| 2.65100765233486  | 9.23492961180384  | 6.46959862144641  | c |
| 2.69487471016863  | 9.73563954224360  | 9.06987226390424  | c |
| 4.19285190808173  | 10.63564168829137 | 4.83556056757527  | c |
| 4.24938146397676  | 11.63516944352587 | 10.02158288982422 | c |
| 1.51111718898891  | 8.62665828387230  | 10.35649641752458 | h |
| 5.74990695560324  | 12.52981138156782 | 5.79955713231092  | c |
| 4.19330361739582  | 10.23879104462266 | 2.80487672611179  | h |
| 5.77644608616272  | 13.03324812446975 | 8.38767023266414  | c |
| 4.27664208366224  | 12.01932924385129 | 12.05218123982871 | h |
| 6.95344959991617  | 13.62093489966694 | 4.52101543529682  | h |
| 7.00174705618605  | 14.51937445171338 | 9.13833419592855  | h |
| -2.47147117821143 | 8.44101724954696  | 4.68323059802181  | c |
| -2.50100594378299 | 10.79767959971989 | 3.47153830922189  | c |
| -4.75135155103343 | 7.34151806755416  | 5.45455693616905  | c |
| -4.78947567739504 | 12.00706329377280 | 2.99981870802353  | c |
| -0.72786903003405 | 11.70883563689808 | 2.91935152936490  | h |
| -7.04085202938835 | 8.55560860215803  | 4.97300330163251  | c |
| -4.72287614950409 | 5.54844345015595  | 6.48671955974092  | h |
| -7.05979265080044 | 10.88457905928867 | 3.74124901061249  | c |
| -4.80047041897141 | 13.85109919971834 | 2.06664924965841  | h |
| -8.81269775405440 | 7.69207448342517  | 5.59640637505861  | h |
| -8.85267361579706 | 11.85150847690313 | 3.38718937801215  | h |

**$[(\mu_3\text{-Bu}^t\text{NAu}_3)_2(\text{PPh}_2(\text{C}_6\text{H}_4)_2\text{PPh}_2)_3]^{2+}$  (2)**

|                   |                    |                    |    |
|-------------------|--------------------|--------------------|----|
| 0.00000000000000  | 0.00000000000000   | -14.00424503192364 | n  |
| 0.61870844962764  | 3.27564832769086   | -11.96628265129037 | au |
| 2.52744044083048  | -2.17364139875905  | -11.96628265129037 | au |
| -3.14614889045816 | -1.10200692893181  | -11.96628265129037 | au |
| 0.00000000000000  | 0.00000000000000   | 14.00424503192364  | n  |
| 0.61870844962764  | -3.27564832769086  | 11.96628265129037  | au |
| 2.52744044083048  | 2.17364139875905   | 11.96628265129037  | au |
| -3.14614889045816 | 1.10200692893181   | 11.96628265129037  | au |
| 5.12478816364012  | -4.24547023876475  | -9.25207127875773  | p  |
| -6.23907915960116 | -2.31546161934372  | -9.25207127875773  | p  |
| 1.11429099596105  | 6.56093185810854   | -9.25207127875773  | p  |
| 1.11429099596105  | -6.56093185810854  | 9.25207127875773   | p  |
| 5.12478816364012  | 4.24547023876475   | 9.25207127875773   | p  |
| -6.23907915960116 | 2.31546161934372   | 9.25207127875773   | p  |
| 0.00000000000000  | 0.00000000000000   | -16.79867601676797 | c  |
| 0.00000000000000  | 0.00000000000000   | 16.79867601676797  | c  |
| 2.59770405524076  | 0.83280986151171   | -17.76971841206574 | c  |
| 4.08730239640692  | -0.47051269011543  | -17.10260908193423 | h  |
| 2.64433565216842  | 0.86404520875574   | -19.85479252454735 | h  |
| 3.06453212882824  | 2.74622823810292   | -17.07566986978152 | h  |
| -2.02008677421171 | 1.83327320560925   | -17.76971841206574 | c  |
| -2.07045292688493 | 1.85803924653282   | -19.85479252454735 | h  |
| -3.91056948320143 | 1.28084855522737   | -17.07566986978152 | h  |
| -1.63617525576050 | 3.77496405329514   | -17.10260908193423 | h  |
| -0.57761778102911 | -2.66608306712087  | -17.76971841206574 | c  |
| -0.57388272528348 | -2.72208445528861  | -19.85479252454735 | h  |
| 0.84603735437318  | -4.02707679333028  | -17.07566986978152 | h  |
| -2.45112714064639 | -3.30445136317977  | -17.10260908193423 | h  |
| -0.57761778102911 | 2.66608306712087   | 17.76971841206574  | c  |
| -0.57388272528348 | 2.72208445528861   | 19.85479252454735  | h  |
| 0.84603735437320  | 4.02707679333028   | 17.07566986978152  | h  |
| -2.45112714064639 | 3.30445136317977   | 17.10260908193423  | h  |
| -2.02008677421171 | -1.83327320560925  | 17.76971841206574  | c  |
| -1.63617525576050 | -3.77496405329514  | 17.10260908193423  | h  |
| -2.07045292688493 | -1.85803924653282  | 19.85479252454735  | h  |
| -3.91056948320143 | -1.28084855522737  | 17.07566986978152  | h  |
| 2.59770405524076  | -0.83280986151171  | 17.76971841206574  | c  |
| 2.64433565216842  | -0.86404520875574  | 19.85479252454735  | h  |
| 3.06453212882824  | -2.74622823810292  | 17.07566986978152  | h  |
| 4.08730239640692  | 0.47051269011543   | 17.10260908193423  | h  |
| 4.44791365403750  | -7.59526677513708  | -8.84215341168389  | c  |
| 6.35507873175417  | -9.33790356174311  | -8.26300843030573  | c  |
| 1.93886818829705  | -8.41686873737811  | -9.05895150845194  | c  |
| 5.74568826108490  | -11.87156367938316 | -7.87135099785272  | c  |
| 8.32645040164440  | -8.72114981647939  | -8.14659323542920  | h  |
| 1.33907560117792  | -10.94828405659741 | -8.65518180077720  | c  |
| 0.45007482995433  | -7.07762325968860  | -9.58231970645425  | h  |

|                    |                    |                    |   |
|--------------------|--------------------|--------------------|---|
| 3.24095609815811   | -12.67572136077849 | -8.05776240540589  | c |
| 7.24165402519032   | -13.23037172623859 | -7.43642950340714  | h |
| -0.62124141347181  | -11.57822986013467 | -8.84097668585786  | h |
| 2.77323389130438   | -14.66824480667165 | -7.76524187553543  | h |
| 8.44632513245812   | -4.05654272618397  | -10.12969386343261 | c |
| 9.10688770486276   | -4.87157571528576  | -12.56435567872547 | c |
| 10.30710940490814  | -3.09910513841326  | -8.51417976212852  | c |
| 11.61168666907889  | -4.75728651602495  | -13.35842930313820 | c |
| 7.65094543062416   | -5.59595780524955  | -13.84632045871680 | h |
| 12.81335619133804  | -2.97469056671937  | -9.32756752067471  | c |
| 9.80842201581265   | -2.44299716619223  | -6.61862248187175  | h |
| 13.46786845175679  | -3.80636234581692  | -11.74014674053885 | c |
| 12.11835381391582  | -5.40197540635976  | -15.25566605460274 | h |
| 14.26517623627223  | -2.22540115184910  | -8.06073843550840  | h |
| 15.43435933511189  | -3.70846282849283  | -12.37005885999200 | h |
| 4.44791365403750   | 7.59526677513708   | 8.84215341168389   | c |
| 6.35507873175417   | 9.33790356174311   | 8.26300843030573   | c |
| 1.93886818829705   | 8.41686873737811   | 9.05895150845194   | c |
| 5.74568826108490   | 11.87156367938316  | 7.87135099785272   | c |
| 8.32645040164440   | 8.72114981647939   | 8.14659323542920   | h |
| 1.33907560117792   | 10.94828405659741  | 8.65518180077720   | c |
| 0.45007482995433   | 7.07762325968860   | 9.58231970645425   | h |
| 3.24095609815811   | 12.67572136077849  | 8.05776240540589   | c |
| 7.24165402519032   | 13.23037172623859  | 7.43642950340714   | h |
| -0.62124141347181  | 11.57822986013467  | 8.84097668585786   | h |
| 2.77323389130438   | 14.66824480667165  | 7.76524187553543   | h |
| 8.44632513245812   | 4.05654272618397   | 10.12969386343261  | c |
| 9.10688770486276   | 4.87157571528576   | 12.56435567872547  | c |
| 10.30710940490814  | 3.09910513841326   | 8.51417976212852   | c |
| 11.61168666907889  | 4.75728651602495   | 13.35842930313820  | c |
| 7.65094543062416   | 5.59595780524955   | 13.84632045871680  | h |
| 12.81335619133804  | 2.97469056671937   | 9.32756752067471   | c |
| 9.80842201581265   | 2.44299716619223   | 6.61862248187175   | h |
| 13.46786845175679  | 3.80636234581692   | 11.74014674053885  | c |
| 12.11835381391582  | 5.40197540635976   | 15.25566605460274  | h |
| 14.26517623627223  | 2.22540115184910   | 8.06073843550840   | h |
| 15.43435933511189  | 3.70846282849283   | 12.37005885999200  | h |
| -7.73623161864136  | 5.28646077023965   | 10.12969386343261  | c |
| -8.77235217832818  | 5.45100824418052   | 12.56435567872547  | c |
| -7.83745848131880  | 7.37666601502929   | 8.51417976212852   | c |
| -9.92577431049821  | 7.67737237819492   | 13.35842930313820  | c |
| -8.67171433316402  | 3.82793420326428   | 13.84632045871680  | h |
| -8.98283569484594  | 9.60934668607759   | 9.32756752067471   | c |
| -7.01990861520220  | 7.27284405363625   | 6.61862248187175   | h |
| -10.03034071336439 | 9.76033504113996   | 11.74014674053885  | c |
| -10.73742483948415 | 7.79381455171931   | 15.25566605460274  | h |
| -9.05984204924860  | 11.24130443414926  | 8.06073843550840   | h |
| -10.92880268602105 | 11.51231586109802  | 12.37005885999200  | h |
| -8.80165080280740  | 0.05437283066758   | 8.84215341168389   | c |
| -11.26440106843585 | 0.83470784387771   | 8.26300843030573   | c |
| -8.25865624103698  | -2.52932526303432  | 9.05895150845194   | c |
| -13.15391985935288 | -0.95986984336609  | 7.87135099785272   | c |
| -11.71596249210341 | 2.85034266293548   | 8.14659323542920   | h |
| -10.15102992145043 | -4.31446854009072  | 8.65518180077720   | c |
| -6.35443895628308  | -3.14903539349989  | 9.58231970645425   | h |
| -12.59797475880634 | -3.531111036683426 | 8.05776240540589   | c |
| -15.07866502902915 | -0.34372951188666  | 7.43642950340714   | h |
| -9.71642048299620  | -6.32712577601686  | 8.84097668585786   | h |
| -14.08968957715902 | -4.93243140283029  | 7.76524187553543   | h |
| 4.35373714876987   | 7.64963960580475   | -8.84215341168389  | c |
| 4.90932233668172   | 10.17261140562087  | -8.26300843030573  | c |
| 6.31978805273997   | 5.88754347434375   | -9.05895150845194  | c |
| 7.40823159844806   | 10.91169383601710  | -7.87135099785272  | c |
| 3.38951209045896   | 11.57149247941493  | -8.14659323542920  | h |
| 8.81195432027247   | 6.63381551650671   | -8.65518180077720  | c |
| 5.90436412632872   | 3.92858786618875   | -9.58231970645425  | h |
| 9.35701866064817   | 9.14461099394428   | -8.05776240540589  | c |
| 7.83701100383886   | 12.88664221435195  | -7.43642950340714  | h |
| 10.33766189646806  | 5.25110408411777   | -8.84097668585786  | h |
| 11.31645568585463  | 9.73581340384138   | -7.76524187553543  | h |
| -0.71009351381676  | 9.34300349642367   | -10.12969386343261 | c |
| -0.33453552653464  | 10.32258395946617  | -12.56435567872547 | c |
| -2.46965092358931  | 10.47577115344260  | -8.51417976212852  | c |
| -1.68591235858067  | 12.43465889421984  | -13.35842930313820 | c |
| 1.02076890253979   | 9.42389200851380   | -13.84632045871680 | h |
| -3.83052049649214  | 12.58403725279694  | -9.32756752067471  | c |
| -2.78851340061039  | 9.71584121982844   | -6.61862248187175  | h |

|                    |                    |                    |   |
|--------------------|--------------------|--------------------|---|
| -3.43752773839239  | 13.56669738695688  | -11.74014674053885 | c |
| -1.38092897443158  | 13.19578995807901  | -15.25566605460274 | h |
| -5.20533418702364  | 13.46670558599838  | -8.06073843550840  | h |
| -4.50555664909083  | 15.22077868959076  | -12.37005885999200 | h |
| -7.73623161864136  | -5.28646077023965  | -10.12969386343261 | c |
| -8.77235217832818  | -5.45100824418052  | -12.56435567872547 | c |
| -7.83745848131880  | -7.37666601502929  | -8.51417976212852  | c |
| -9.92577431049821  | -7.67737237819492  | -13.35842930313820 | c |
| -8.67171433316402  | -3.82793420326428  | -13.84632045871680 | h |
| -8.98283569484594  | -9.60934668607759  | -9.32756752067471  | c |
| -7.01990861520220  | -7.27284405363625  | -6.61862248187175  | h |
| -10.03034071336439 | -9.76033504113996  | -11.74014674053885 | c |
| -10.73742483948415 | -7.79381455171931  | -15.25566605460274 | h |
| -9.05984204924860  | -11.24130443414926 | -8.06073843550840  | h |
| -10.92880268602105 | -11.51231586109802 | -12.37005885999200 | h |
| -8.80165080280740  | -0.05437283066758  | -8.84215341168389  | c |
| -11.26440106843585 | -0.83470784387771  | -8.26300843030573  | c |
| -8.25865624103698  | 2.52932526303432   | -9.05895150845194  | c |
| -13.15391985953288 | 0.95986984336609   | -7.87135099785272  | c |
| -11.71596249210341 | -2.85034266293548  | -8.14659323542920  | h |
| -10.15102992145043 | 4.31446854009072   | -8.65518180077720  | c |
| -6.35443895628308  | 3.14903539349989   | -9.58231970645425  | h |
| -12.59797475880634 | 3.53111036683426   | -8.05776240540589  | c |
| -15.07866502902915 | 0.34372951188666   | -7.43642950340714  | h |
| -9.71642048299620  | 6.32712577601686   | -8.84097668585786  | h |
| -14.08968957715902 | 4.93243140283029   | -7.76524187553543  | h |
| -0.71009351381676  | -9.34300349642367  | 10.12969386343261  | c |
| -0.33453552653464  | -10.32258395946617 | 12.56435567872547  | c |
| -2.46965092358931  | -10.47577115344260 | 8.51417976212852   | c |
| -1.68591235858067  | -12.43465889421984 | 13.35842930313820  | c |
| 1.02076890253979   | -9.42389200851380  | 13.84632045871680  | h |
| -3.83052049649214  | -12.58403725279694 | 9.32756752067471   | c |
| -2.78851340061039  | -9.71584121982844  | 6.61862248187175   | h |
| -3.43752773839239  | -13.56669738695688 | 11.74014674053885  | c |
| -1.38092897443159  | -13.19578995807901 | 15.25566605460274  | h |
| -5.20533418702364  | -13.46670558599838 | 8.06073843550840   | h |
| -4.50555664909083  | -15.22077868959076 | 12.37005885999200  | h |
| 4.35373714876987   | -7.64963960580475  | 8.84215341168389   | c |
| 4.90932233668172   | -10.17261140562087 | 8.26300843030573   | c |
| 6.31978805273997   | -5.88754347434375  | 9.05895150845194   | c |
| 7.40823159844806   | -10.91169383601710 | 7.87135099785272   | c |
| 3.38951209045896   | -11.57149247941493 | 8.14659323542920   | h |
| 8.81195432027247   | -6.63381551650671  | 8.65518180077720   | c |
| 5.90436412632872   | -3.92858786618875  | 9.58231970645425   | h |
| 9.35701866064817   | -9.14461099394428  | 8.05776240540589   | c |
| 7.83701100383886   | -12.88664221435195 | 7.43642950340714   | h |
| 10.33766189646806  | -5.25110408411777  | 8.84097668585786   | h |
| 11.31645568585463  | -9.73581340384138  | 7.76524187553543   | h |
| -2.92531022422775  | -3.84875257353115  | -1.25756940717152  | c |
| -1.38551804291897  | -3.85148584721897  | -3.41132735327805  | c |
| -5.50101759494847  | -3.27462281839448  | -1.54967900928221  | c |
| -2.39007606874560  | -3.33647059277212  | -5.78434328453293  | c |
| 0.64095255202509   | -4.20703352524274  | -3.23040999244166  | h |
| -6.51468508624798  | -2.77439227333007  | -3.92519587596790  | c |
| -6.74138204467913  | -3.26914028941577  | 0.10418033052502   | h |
| -4.96907004446641  | -2.82259704095045  | -6.07704482954958  | h |
| -1.13544857971287  | -3.30123000497118  | -7.42933691308309  | h |
| -8.53042909093178  | -2.34695523681441  | -4.10191449738041  | h |
| -1.87046238944486  | 4.45776925489726   | -1.25756940717152  | c |
| -2.64272556454838  | 3.12563674617902   | -3.41132735327805  | c |
| -0.08539775106759  | 6.40133239308780   | -1.54967900928221  | c |
| -1.69443025794765  | 3.73810188889703   | -5.78434328453293  | c |
| -3.96387418344550  | 1.54843556994718   | -3.23040999244166  | h |
| 0.85464835435690   | 7.02907891901141   | -3.92519587596790  | c |
| 0.53953248317034   | 7.47277825201633   | 0.10418033052502   | h |
| 0.04009428012325   | 5.71463941216744   | -6.07704482954958  | c |
| -2.29122475818402  | 2.63394231720788   | -7.42933691308309  | h |
| 2.23269168883966   | 8.56104591633595   | -4.10191449738041  | h |
| 4.79577261367261   | -0.60901668136596  | -1.25756940717152  | c |
| 4.02824360746736   | 0.72584910103992   | -3.41132735327805  | c |
| 5.58641534601611   | -3.12670957469327  | -1.54967900928221  | c |
| 4.08450632669325   | -0.40163129612479  | -5.78434328453293  | c |
| 3.32292163142047   | 2.65859795529559   | -3.23040999244166  | h |
| 5.66003673189114   | -4.25468664568134  | -3.92519587596790  | c |
| 6.20184956150888   | -4.20363796260050  | 0.10418033052502   | h |
| 4.92897576434314   | -2.89204237121692  | -6.07704482954958  | h |
| 3.42667333789686   | 0.66728768776330   | -7.42933691308309  | h |



|                    |                   |                   |   |
|--------------------|-------------------|-------------------|---|
| 6.29773740209201   | -6.21409067952143 | -4.10191449738041 | h |
| 4.79577261367261   | 0.60901668136596  | 1.25756940717152  | c |
| 5.58641534601611   | 3.12670957469327  | 1.54967900928221  | c |
| 4.02824360746736   | -0.72584910103992 | 3.41132735327805  | c |
| 5.66003673189114   | 4.25468664568134  | 3.92519587596790  | c |
| 6.20184956150888   | 4.20363796260050  | -0.10418033052502 | h |
| 4.084564832669325  | 0.40163129612479  | 5.78434328453293  | c |
| 3.32292163142047   | -2.65859795529559 | 3.23040999244166  | h |
| 4.92897576434314   | 2.89204237121692  | 6.07704482954958  | c |
| 6.29773740209201   | 6.21409067952143  | 4.10191449738041  | h |
| 3.42667333789686   | -0.66728768776330 | 7.42933691308309  | h |
| -1.87046238944486  | -4.45776925489726 | 1.25756940717152  | c |
| -0.08539775106759  | -6.40133239308780 | 1.54967900928221  | c |
| -2.64272556454838  | -3.12563674617902 | 3.41132735327805  | c |
| 0.85464835435690   | -7.02907891901141 | 3.92519587596790  | c |
| 0.53953248317034   | -7.47277825201633 | -0.10418033052502 | h |
| -1.69443025794765  | -3.73810188889703 | 5.78434328453293  | c |
| -3.96387418344550  | -1.54843556994718 | 3.23040999244166  | h |
| 0.04009428012325   | -5.71463941216744 | 6.07704482954958  | c |
| 2.23269168883967   | -8.56104591633595 | 4.10191449738041  | h |
| -2.29122475818402  | -2.63394231720788 | 7.42933691308309  | h |
| -2.92531022422775  | 3.84875257353115  | 1.25756940717152  | c |
| -5.501017159494847 | 3.27462281839448  | 1.54967900928221  | c |
| -1.38551804291897  | 3.85148584721897  | 3.41132735327805  | c |
| -6.51468508624798  | 2.77439227333007  | 3.92519587596790  | c |
| -6.74138204467913  | 3.26914028941577  | -0.10418033052502 | h |
| -2.39007606874560  | 3.33647059277212  | 5.78434328453293  | c |
| 0.64095255202509   | 4.20703352524274  | 3.23040999244166  | h |
| -4.96907004446641  | 2.82259704095045  | 6.07704482954958  | c |
| -8.53042909093178  | 2.34695523681441  | 4.10191449738041  | h |
| -1.13544857971287  | 3.30123000497118  | 7.42933691308309  | h |

**$[(\mu_3\text{-Bu}^t\text{Au}_3)_2(\text{PPh}_2(\text{C}_6\text{H}_4)_3\text{PPh}_2)_3]^{2+}$  (3)**

|                   |                   |                    |    |
|-------------------|-------------------|--------------------|----|
| 0.000000000000000 | 0.000000000000000 | -18.18960880398321 | n  |
| 0.46878473452298  | 3.30772855234505  | -16.17945411029167 | au |
| 2.63018458789249  | -2.05984376517578 | -16.17945411029167 | au |
| -3.09896932241540 | -1.24788478716931 | -16.17945411029167 | au |
| 0.000000000000000 | 0.000000000000000 | 18.18960880398321  | n  |
| 0.46878473452298  | -3.30772855234505 | 16.17945411029167  | au |
| 2.63018458789249  | 2.05984376517578  | 16.17945411029167  | au |
| -3.09896932241540 | 1.24788478716931  | 16.17945411029167  | au |
| 5.36089152691554  | -4.17578363180435 | -13.65409691342012 | p  |
| -6.29678046930759 | -2.55477643333946 | -13.65409691342012 | p  |
| 0.93588894239193  | 6.73056006514380  | -13.65409691342012 | p  |
| 0.93588894239193  | -6.73056006514380 | 13.65409691342012  | p  |
| 5.36089152691554  | 4.17578363180433  | 13.65409691342012  | p  |
| -6.29678046930759 | 2.55477643333946  | 13.65409691342012  | p  |
| -3.22437722064478 | -3.98904058107072 | -2.57149567345196  | c  |
| -0.99992625795813 | -5.28073791686863 | -1.92941445932249  | c  |
| -4.74626641194374 | -3.12784294402850 | -0.57793026967154  | c  |
| -0.33565824260467 | -5.67430875788630 | 0.57793026967154   | c  |
| 0.22917892980451  | -6.02270117637084 | -3.41541542083665  | h  |
| -4.07329005775683 | -3.50633049973718 | 1.92941445932249   | c  |
| -6.49090136114293 | -2.10362966794477 | -0.98802376451937  | h  |
| -1.84242186961186 | -4.78691287499765 | 2.57149567345196   | c  |
| 1.42365394797671  | -6.67310030618113 | 0.98802376451937   | h  |
| -5.33040168304184 | -2.81287581296254 | 3.41541542083665   | h  |
| -1.84242186961186 | 4.78691287499765  | -2.57149567345196  | c  |
| -4.07329005775683 | 3.50633049973718  | -1.92941445932249  | c  |
| -0.33565824260467 | 5.67430875788630  | -0.57793026967154  | c  |
| -4.74626641194374 | 3.12784294402850  | 0.57793026967154   | c  |
| -5.33040168304184 | 2.81287581296254  | -3.41541542083665  | h  |
| -0.99992625795813 | 5.28073791686863  | 1.92941445932249   | c  |
| 1.42365394797671  | 6.67310030618113  | -0.98802376451937  | h  |
| -3.22437722064478 | 3.98904058107072  | 2.57149567345196   | c  |
| -6.49090136114293 | 2.10362966794477  | 0.98802376451937   | h  |
| 0.22917892980451  | 6.02270117637084  | 3.41541542083665   | h  |
| 5.06679909025667  | -0.79787229392689 | -2.57149567345196  | c  |
| 5.07321631571504  | 1.77440741713147  | -1.92941445932249  | c  |
| 5.08192465454843  | -2.54646581385787 | -0.57793026967154  | c  |
| 5.08192465454843  | 2.54646581385787  | 0.57793026967154   | c  |
| 5.10122275323734  | 3.20982536340827  | -3.41541542083665  | h  |
| 5.07321631571504  | -1.77440741713147 | 1.92941445932249   | c  |
| 5.06724741316625  | -4.56947063823641 | -0.98802376451937  | h  |
| 5.06679909025667  | 0.79787229392689  | 2.57149567345196   | c  |

|                   |                    |                    |   |
|-------------------|--------------------|--------------------|---|
| 5.06724741316625  | 4.56947063823641   | 0.98802376451937   | h |
| 5.10122275323734  | -3.20982536340827  | 3.41541542083665   | h |
| 0.00000000000000  | 0.00000000000000   | -20.98496869800709 | c |
| 0.00000000000000  | 0.00000000000000   | 20.98496869800709  | c |
| 2.54793867569317  | 0.97248071678966   | -21.95981963674189 | c |
| 4.10721056058328  | -0.24542122923266  | -21.29070097588863 | h |
| 2.59114696632727  | 1.00245707848540   | -24.04518944466628 | h |
| 2.91078470677854  | 2.90944419531193   | -21.26900336447432 | h |
| -2.11616234327699 | 1.72033926204036   | -21.95981963674189 | c |
| -2.16372677933552 | 1.74277055853566   | -24.04518944466628 | h |
| -3.97504493742261 | 1.06609140336149   | -21.26900336447432 | h |
| -1.84106426114821 | 3.67965929877321   | -21.29070097588863 | h |
| -0.43177633241616 | -2.69281997883001  | -21.95981963674189 | c |
| -0.42742018699168 | -2.74522763702112  | -24.04518944466628 | h |
| 1.06426023064408  | -3.97553559867342  | -21.26900336447432 | h |
| -2.26614629943511 | -3.43423806954049  | -21.29070097588863 | h |
| -0.43177633241616 | 2.69281997883001   | 21.95981963674189  | c |
| -0.42742018699168 | 2.74522763702112   | 24.04518944466628  | h |
| 1.06426023064408  | 3.97553559867342   | 21.26900336447432  | h |
| -2.26614629943511 | 3.43423806954049   | 21.29070097588863  | h |
| -2.11616234327699 | -1.72033926204036  | 21.95981963674189  | c |
| -1.84106426114821 | -3.67965929877321  | 21.29070097588863  | h |
| -2.16372677933552 | -1.74277055853565  | 24.04518944466628  | h |
| -3.97504493742261 | -1.06609140336149  | 21.26900336447432  | h |
| 2.54793867569317  | -0.97248071678966  | 21.95981963674189  | c |
| 2.59114696632727  | -1.00245707848540  | 24.04518944466628  | h |
| 2.91078470677854  | -2.90944419531193  | 21.26900336447432  | h |
| 4.10721056058328  | 0.24542122923266   | 21.29070097588863  | h |
| 4.86495943921002  | -7.58364509139150  | -13.63152244608190 | c |
| 6.87567679946794  | -9.29662128768671  | -13.47739402346138 | c |
| 2.37414444387170  | -8.48232035517420  | -13.72807265120073 | c |
| 6.39162967555875  | -11.88649986070039 | -13.39859883381835 | c |
| 8.82690951112887  | -8.61045403757623  | -13.44410370823315 | h |
| 1.90186972237747  | -11.06962472149860 | -13.63767223816742 | c |
| 0.79711341155151  | -7.15090021521834  | -13.90224234202278 | h |
| 3.91006350578230  | -12.77295386785371 | -13.47248127827735 | c |
| 7.96718978188473  | -13.22058766109268 | -13.29269820973388 | h |
| -0.04506468704098 | -11.75967137500662 | -13.72461716928368 | h |
| 3.53934402774356  | -14.80633199829416 | -13.42356420498361 | h |
| 8.64866974113340  | -3.70290058900072  | -14.56096574975641 | c |
| 9.29829331589603  | -4.21347342629019  | -17.08050894038123 | c |
| 10.48876539823883 | -2.80589794849202  | -12.88857269768702 | c |
| 11.77106712922610 | -3.86077827269052  | -17.90380826854436 | c |
| 7.85690326979605  | -4.88751586194881  | -18.40576856440853 | h |
| 12.96216882567638 | -2.43966026678053  | -13.72961956077582 | c |
| 9.99997535426089  | -2.38369448260867  | -10.92524761835256 | h |
| 13.60643675502539 | -2.97090451583443  | -16.22797341056878 | c |
| 12.26804335746478 | -4.26999853463675  | -19.86794652119249 | h |
| 14.39572274303805 | -1.73765012311878  | -12.41580577080600 | h |
| 15.54752357016844 | -2.68521879019051  | -16.87942382432729 | h |
| 4.86495943921002  | 7.58364509139150   | 13.63152244608190  | c |
| 6.87567679946794  | 9.29662128768675   | 13.47739402346138  | c |
| 2.37414444387170  | 8.48232035517420   | 13.72807265120073  | c |
| 6.39162967555875  | 11.88649986070039  | 13.39859883381835  | c |
| 8.82690951112887  | 8.61045403757623   | 13.44410370823315  | h |
| 1.90186972237747  | 11.06962472149857  | 13.63767223816742  | c |
| 0.79711341155151  | 7.15090021521834   | 13.90224234202278  | h |
| 3.91006350578230  | 12.77295386785371  | 13.47248127827735  | c |
| 7.96718978188473  | 13.22058766109268  | 13.29269820973388  | h |
| -0.04506468704098 | 11.75967137500662  | 13.72461716928368  | h |
| 3.53934402774356  | 14.80633199829416  | 13.42356420498361  | h |
| 8.64866974113340  | 3.70290058900072   | 14.56096574975641  | c |
| 9.29829331589603  | 4.21347342629019   | 17.08050894038123  | c |
| 10.48876539823883 | 2.80589794849202   | 12.88857269768702  | c |
| 11.77106712922610 | 3.86077827269052   | 17.90380826854436  | c |
| 7.85690326979605  | 4.88751586194881   | 18.40576856440853  | h |
| 12.96216882567638 | 2.43966026678053   | 13.72961956077582  | c |
| 9.99997535426089  | 2.38369448260867   | 10.92524761835256  | h |
| 13.60643675502539 | 2.97090451583443   | 16.22797341056878  | c |
| 12.26804335746478 | 4.26999853463675   | 19.86794652119249  | h |
| 14.39572274303805 | 1.73765012311878   | 12.41580577080600  | h |
| 15.54752357016844 | 2.68521879019051   | 16.87942382432729  | h |
| -7.53114084832963 | 5.63851741026293   | 14.56096574975641  | c |
| -8.29812168328602 | 5.94582151025993   | 17.08050894038123  | c |
| -7.67436160294017 | 7.68058831496399   | 12.88857269768702  | c |
| -9.22906562714198 | 8.26365402721646   | 17.90380826854436  | c |
| -8.16116453274519 | 4.36051989574602   | 18.40576856440853  | h |

|                    |                    |                    |   |
|--------------------|--------------------|--------------------|---|
| -8.59389218047363  | 10.00573735778812  | 13.72961956077582  | c |
| -7.06432765393033  | 7.46838545270391   | 10.92524761835256  | h |
| -9.37609716044319  | 10.29806762692104  | 16.22797341056878  | c |
| -9.83194888385015  | 8.48943793497505   | 19.86794652119249  | h |
| -8.70271052102901  | 11.59823653974891  | 12.41580577080600  | h |
| -10.09922947210850 | 12.12194098260790  | 16.87942382432729  | h |
| -9.00010902203521  | 0.42135591704104   | 13.63152244608190  | c |
| -11.48894860423395 | 1.30620013270722   | 13.47739402346138  | c |
| -8.53297713255450  | -2.18509077694056  | 13.72807265120073  | c |
| -13.48982567922615 | -0.40793625973386  | 13.39859883381835  | c |
| -11.87032669022366 | 3.33910085475591   | 13.44410370823315  | h |
| -10.53751108036675 | -3.88774486648206  | 13.63767223816742  | c |
| -6.59141795208240  | -2.88512964350831  | 13.90224234202278  | h |
| -13.01673428381913 | -3.00026260750888  | 13.47248127827735  | c |
| -15.43295965840773 | 0.28949491733762   | 13.29269820973388  | h |
| -10.16164180739200 | -5.91886285129436  | 13.72461716928368  | h |
| -14.59233166126086 | -4.33800415838847  | 13.42356420498361  | h |
| 4.13514958282513   | 8.00500100843253   | -13.63152244608190 | c |
| 4.61327180476589   | 10.60282142039399  | -13.47739402346138 | c |
| 6.15883268868285   | 6.29722957823365   | -13.72807265120073 | c |
| 7.09819600366739   | 11.47856360096661  | -13.39859883381835 | c |
| 3.04341717909489   | 11.94955489233224  | -13.44410370823315 | h |
| 8.63564135798937   | 7.18187985501657   | -13.63767223816742 | c |
| 5.79430454053091   | 4.26577057171008   | -13.90224234202278 | h |
| 9.10667077803678   | 9.77269126034477   | -13.47248127827735 | c |
| 7.46576987652302   | 13.51008257843035  | -13.29269820973388 | h |
| 10.20670649443289  | 5.84080852371227   | -13.72461716928368 | h |
| 11.05298763351739  | 10.46832783990568  | -13.42356420498361 | h |
| -1.11752889280373  | 9.34141799926360   | -14.56096574975641 | c |
| -1.00017163261000  | 10.15929493655009  | -17.08050894038123 | c |
| -2.81440379529865  | 10.48648626345600  | -12.88857269768702 | c |
| -2.54200150208402  | 12.12443229990698  | -17.90380826854436 | h |
| 0.30426126294907   | 9.24803575769483   | -18.40576856440853 | h |
| -4.36827664520274  | 12.44539762456872  | -13.72961956077582 | c |
| -2.93564770033055  | 9.85207993531254   | -10.92524761835256 | h |
| -4.23033959458219  | 13.26897214275554  | -16.22797341056878 | c |
| -2.43609447361467  | 12.75943646961179  | -19.86794652119249 | h |
| -5.69301222200901  | 13.33588666286772  | -12.41580577080600 | h |
| -5.44829409805992  | 14.80715977279853  | -16.87942382432729 | h |
| -7.53114084832963  | -5.63851741026293  | -14.56096574975641 | c |
| -8.29812168328602  | -5.94582151025993  | -17.08050894038123 | c |
| -7.67436160294017  | -7.68058831496399  | -12.88857269768702 | c |
| -9.22906562714198  | -8.26365402721646  | -17.90380826854436 | c |
| -8.16116453274519  | -4.36051989574602  | -18.40576856440853 | h |
| -8.59389218047363  | -10.00573735778812 | -13.72961956077582 | c |
| -7.06432765393033  | -7.46838545270391  | -10.92524761835256 | h |
| -9.37609716044319  | -10.29806762692104 | -16.22797341056878 | c |
| -9.83194888385015  | -8.48943793497510  | -19.86794652119249 | h |
| -8.70271052102901  | -11.59823653974891 | -12.41580577080600 | h |
| -10.09922947210850 | -12.12194098260790 | -16.87942382432729 | h |
| -9.00010902203521  | -0.42135591704104  | -13.63152244608190 | c |
| -11.48894860423395 | -1.30620013270722  | -13.47739402346138 | c |
| -8.53297713255450  | 2.18509077694058   | -13.72807265120073 | c |
| -13.48982567922615 | 0.40793625973386   | -13.39859883381835 | c |
| -11.87032669022366 | -3.33910085475591  | -13.44410370823315 | h |
| -10.53751108036675 | 3.88774486648206   | -13.63767223816742 | c |
| -6.59141795208240  | 2.88512964350831   | -13.90224234202278 | h |
| -13.01673428381913 | 3.00026260750888   | -13.47248127827735 | c |
| -15.43295965840773 | -0.28949491733762  | -13.29269820973388 | h |
| -10.16164180739200 | 5.91886285129436   | -13.72461716928368 | h |
| -14.59233166126086 | 4.33800415838847   | -13.42356420498361 | h |
| -1.11752889280373  | -9.34141799926360  | 14.56096574975641  | c |
| -1.00017163261000  | -10.15929493655009 | 17.08050894038123  | c |
| -2.81440379529865  | -10.48648626345600 | 12.88857269768702  | c |
| -2.54200150208402  | -12.12443229990695 | 17.90380826854436  | c |
| 0.30426126294907   | -9.24803575769483  | 18.40576856440853  | h |
| -4.36827664520274  | -12.44539762456877 | 13.72961956077582  | c |
| -2.93564770033055  | -9.85207993531254  | 10.92524761835256  | h |
| -4.23033959458219  | -13.26897214275554 | 16.22797341056878  | c |
| -2.43609447361467  | -12.75943646961179 | 19.86794652119249  | h |
| -5.69301222200901  | -13.33588666286772 | 12.41580577080600  | h |
| -5.44829409805992  | -14.80715977279853 | 16.87942382432729  | h |
| 4.13514958282513   | -8.00500100843253  | 13.63152244608190  | c |
| 4.61327180476589   | -10.60282142039399 | 13.47739402346138  | c |
| 6.15883268868285   | -6.29722957823365  | 13.72807265120073  | c |
| 7.09819600366739   | -11.47856360096661 | 13.39859883381835  | c |
| 3.04341717909489   | -11.94955489233224 | 13.44410370823315  | h |

|                   |                    |                    |   |
|-------------------|--------------------|--------------------|---|
| 8.63564135798937  | -7.18187985501657  | 13.63767223816742  | c |
| 5.79430454053091  | -4.26577057171008  | 13.90224234202278  | h |
| 9.10667077803678  | -9.77269126034477  | 13.47248127827735  | c |
| 7.46576987652302  | -13.51008257843035 | 13.29269820973388  | h |
| 10.20670649443289 | -5.84080852371227  | 13.72461716928368  | h |
| 11.05298763351742 | -10.46832783990568 | 13.42356420498361  | h |
| -3.94911910555959 | -3.57258486181330  | -5.23862770140912  | c |
| -2.12609176834684 | -3.43537345756662  | -7.16471564806119  | c |
| -6.50040715685922 | -3.29933562892861  | -5.93174678697239  | c |
| -2.82456651750295 | -3.09353059258590  | -9.67810178109514  | c |
| -0.11446917116543 | -3.54295041002008  | -6.70537030515941  | h |
| -7.20467053872540 | -2.92622321240552  | -8.43344325977817  | c |
| -7.98010657860321 | -3.43578075687421  | -4.49728293956584  | h |
| -5.37451508384342 | -2.85167681833198  | -10.34535542421180 | c |
| -1.35545003652858 | -2.98962400559618  | -11.13456122341222 | h |
| -9.20795494183245 | -2.71713445758260  | -8.90351487688694  | h |
| -1.11938969472625 | 5.20632989889173   | -5.23862770140912  | c |
| -1.91207480156600 | 3.55893621094875   | -7.16471564806119  | c |
| 0.39289510816631  | 7.27918554724655   | -5.93174678697239  | c |
| -1.26679282181220 | 3.99291165512942   | -9.67810178109514  | c |
| -3.01105047384307 | 1.87060841518946   | -6.70537030515941  | h |
| 1.06815163027583  | 7.70253931863624   | -8.43344325977817  | c |
| 1.01457987201481  | 8.62886540041480   | -4.49728293956584  | h |
| 0.21763297386299  | 6.08030500479711   | -10.34535542421180 | c |
| -1.91136531834572 | 2.66866616799242   | -11.13456122341222 | h |
| 2.25087000515169  | 9.33289012532073   | -8.90351487688694  | h |
| 5.06850880028585  | -1.63374503707839  | -5.23862770140912  | c |
| 4.03816656991288  | -0.12356275338211  | -7.16471564806119  | c |
| 6.10751204869284  | -3.97984991831794  | -5.93174678697239  | c |
| 4.09135933931516  | -0.89938106254358  | -9.67810178109514  | c |
| 3.12551964500857  | 1.67234199483059   | -6.70537030515941  | h |
| 6.13651890844955  | -4.77631610623075  | -8.43344325977817  | c |
| 6.96552670658836  | -5.19308464354062  | -4.49728293956584  | h |
| 5.15688210998038  | -3.22862818646502  | -10.34535542421180 | c |
| 3.26681535487437  | 0.32095783760375   | -11.13456122341222 | h |
| 6.95708493668084  | -6.61575566773820  | -8.90351487688694  | h |
| 5.06850880028585  | 1.63374503707839   | 5.23862770140912   | c |
| 6.10751204869284  | 3.97984991831794   | 5.93174678697239   | c |
| 4.03816656991288  | 0.12356275338211   | 7.16471564806119   | c |
| 6.13651890844955  | 4.77631610623075   | 8.43344325977817   | c |
| 6.96552670658836  | 5.19308464354062   | 4.49728293956584   | h |
| 4.09135933931516  | 0.89938106254358   | 9.67810178109514   | c |
| 3.12551964500857  | -1.67234199483059  | 6.70537030515941   | h |
| 5.15688210998038  | 3.22862818646502   | 10.34535542421180  | c |
| 6.95708493668084  | 6.61575566773820   | 8.90351487688694   | h |
| 3.26681535487437  | -0.32095783760375  | 11.13456122341222  | h |
| -1.11938969472625 | -5.20632989889173  | 5.23862770140912   | c |
| 0.39289510816631  | -7.27918554724655  | 5.93174678697239   | c |
| -1.91207480156600 | -3.55893621094875  | 7.16471564806119   | c |
| 1.06815163027583  | -7.70253931863624  | 8.43344325977817   | c |
| 1.01457987201481  | -8.62886540041480  | 4.49728293956584   | h |
| -1.26679282181220 | -3.99291165512942  | 9.67810178109514   | c |
| -3.01105047384307 | -1.87060841518946  | 6.70537030515941   | h |
| 0.21763297386299  | -6.08030500479711  | 10.34535542421180  | c |
| 2.25087000515169  | -9.33289012532073  | 8.90351487688694   | h |
| -1.91136531834572 | -2.66866616799242  | 11.13456122341222  | h |
| -3.94911910555959 | 3.57258486181330   | 5.23862770140912   | c |
| -6.50040715685922 | 3.29933562892861   | 5.93174678697239   | c |
| -2.12609176834684 | 3.43537345756662   | 7.16471564806119   | c |
| -7.20467053872540 | 2.92622321240552   | 8.43344325977817   | c |
| -7.98010657860321 | 3.43578075687421   | 4.49728293956584   | h |
| -2.82456651750295 | 3.09353059258590   | 9.67810178109514   | c |
| -0.11446917116543 | 3.54295041002008   | 6.70537030515941   | h |
| -5.37451508384342 | 2.85167681833198   | 10.34535542421180  | c |
| -9.20795494183245 | 2.71713445758260   | 8.90351487688694   | h |
| -1.35545003652858 | 2.98962400559620   | 11.13456122341222  | h |

**$[(\mu_3\text{-Bu}^t\text{NAu}_3)_4\{(\text{PPh}_2\text{C}_6\text{H}_4)_3\text{C}_6\text{H}_3\}_3]^{4+}$  (4)**

|                    |                    |                    |    |
|--------------------|--------------------|--------------------|----|
| -8.96183071402911  | 8.35798996565733   | 12.71217605308315  | au |
| -6.39724943781630  | -5.05729780897629  | -13.71773777386502 | p  |
| -6.39724943781630  | 5.05729780897629   | 13.71773777386502  | p  |
| -11.18835173096916 | 11.18835173096916  | 11.18835173096916  | n  |
| 8.96183071402911   | -8.35798996565733  | 12.71217605308315  | au |
| 11.18835173096916  | -11.18835173096916 | 11.18835173096916  | n  |
| 8.96183071402911   | 8.35798996565730   | -12.71217605308315 | au |

|                    |                    |                    |    |
|--------------------|--------------------|--------------------|----|
| 6.39724943781630   | -5.05729780897629  | 13.71773777386502  | p  |
| 6.39724943781630   | 5.05729780897629   | -13.71773777386502 | p  |
| -8.96183071402911  | -8.35798996565730  | -12.71217605308315 | au |
| 8.35798996565730   | -12.71217605308315 | 8.96183071402911   | au |
| -8.35798996565730  | -12.71217605308315 | -8.96183071402911  | au |
| -8.35798996565733  | 12.71217605308315  | 8.96183071402911   | au |
| 8.35798996565733   | 12.71217605308315  | -8.96183071402911  | au |
| -12.71217605308315 | -8.96183071402911  | -8.35798996565730  | au |
| -12.71217605308315 | 8.96183071402911   | 8.35798996565730   | au |
| 12.71217605308315  | 8.96183071402911   | -8.35798996565733  | au |
| 12.71217605308315  | -8.96183071402911  | 8.35798996565733   | au |
| -5.05729780897629  | 13.71773777386502  | 6.39724943781630   | p  |
| 5.05729780897629   | 13.71773777386502  | -6.39724943781630  | p  |
| 5.05729780897629   | -13.71773777386502 | 6.39724943781630   | p  |
| -5.05729780897629  | -13.71773777386502 | -6.39724943781630  | p  |
| 13.71773777386502  | -6.39724943781630  | 5.05729780897629   | p  |
| 13.71773777386502  | 6.39724943781630   | -5.05729780897629  | p  |
| -13.71773777386502 | 6.39724943781630   | 5.05729780897629   | p  |
| -13.71773777386502 | -6.39724943781630  | -5.05729780897629  | p  |
| -11.18835173096916 | -11.18835173096916 | -11.18835173096916 | n  |
| 11.18835173096916  | 11.18835173096916  | -11.18835173096916 | n  |
| -5.04206620184753  | -11.68765303202173 | -3.59061755459760  | c  |
| -3.81298602826709  | -12.31723785580189 | -1.33124237576697  | c  |
| -6.19418303039334  | -9.31617510398146  | -3.76369666442265  | c  |
| -3.71276735096184  | -10.59264772657551 | 0.65304652100808   | c  |
| -6.05594955050423  | -7.58488583038511  | -1.79781244139128  | c  |
| -4.81019230262172  | -8.17939806939267  | 0.46272339861967   | c  |
| -11.68765303202173 | 3.59061755459760   | 5.04206620184753   | c  |
| -9.31617510398146  | 3.76369666442265   | 6.19418303039334   | c  |
| -12.31723785580189 | 1.33124237576698   | 3.81298602826709   | c  |
| -7.58488583038511  | 1.79781244139128   | 6.05594955050423   | c  |
| -10.59264772657551 | -0.65304652100808  | 3.71276735096184   | c  |
| -8.17939806939267  | -0.46272339861967  | 4.81019230262172   | c  |
| 3.59061755459760   | -5.04206620184753  | 11.68765303202173  | c  |
| 1.33124237576697   | -3.81298602826709  | 12.31723785580189  | c  |
| 3.76369666442265   | -6.19418303039334  | 9.31617510398146   | c  |
| -0.65304652100808  | -3.71276735096184  | 10.59264772657551  | c  |
| 1.79781244139128   | -6.05594955050423  | 7.58488583038511   | c  |
| -0.46272339861967  | -4.81019230262172  | 8.17939806939267   | c  |
| -3.59061755459760  | 5.04206620184753   | 11.68765303202173  | c  |
| -3.76369666442265  | 6.19418303039334   | 9.31617510398146   | c  |
| -1.33124237576697  | 3.81298602826709   | 12.31723785580189  | c  |
| -1.79781244139128  | 6.05594955050423   | 7.58488583038511   | c  |
| 0.65304652100808   | 3.71276735096184   | 10.59264772657551  | c  |
| 0.46272339861967   | 4.81019230262172   | 8.17939806939267   | c  |
| 11.68765303202173  | -3.59061755459760  | 5.04206620184753   | c  |
| 9.31617510398146   | -3.76369666442265  | 6.19418303039334   | c  |
| 12.31723785580189  | -1.33124237576697  | 3.81298602826709   | c  |
| 7.58488583038511   | -1.79781244139128  | 6.05594955050423   | c  |
| 10.59264772657551  | 0.65304652100808   | 3.71276735096184   | c  |
| 8.17939806939267   | 0.46272339861967   | 4.81019230262172   | c  |
| 5.04206620184753   | 11.68765303202173  | -3.59061755459760  | c  |
| 6.19418303039334   | 9.31617510398146   | -3.76369666442265  | c  |
| 3.81298602826709   | 12.31723785580189  | -1.33124237576697  | c  |
| 6.05594955050423   | 7.58488583038511   | -1.79781244139128  | c  |
| 3.71276735096184   | 10.59264772657551  | 0.65304652100808   | c  |
| 4.81019230262172   | 8.17939806939267   | 0.46272339861967   | c  |
| 3.59061755459760   | 5.04206620184753   | -11.68765303202173 | c  |
| 3.76369666442265   | 6.19418303039334   | -9.31617510398146  | c  |
| 1.33124237576698   | 3.81298602826709   | -12.31723785580189 | c  |
| 1.79781244139128   | 6.05594955050423   | -7.58488583038511  | c  |
| -0.65304652100808  | 3.71276735096184   | -10.59264772657551 | c  |
| -0.46272339861967  | 4.81019230262172   | -8.17939806939267  | c  |
| -5.04206620184753  | 11.68765303202173  | 3.59061755459760   | c  |
| -6.19418303039334  | 9.31617510398146   | 3.76369666442265   | c  |
| -3.81298602826709  | 12.31723785580189  | 1.33124237576697   | c  |
| -6.05594955050423  | 7.58488583038511   | 1.79781244139128   | c  |
| -3.71276735096184  | 10.59264772657551  | -0.65304652100808  | c  |
| -4.81019230262172  | 8.17939806939267   | -0.46272339861967  | c  |
| -11.68765303202173 | -3.59061755459760  | -5.04206620184753  | c  |
| -9.31617510398146  | -3.76369666442265  | -6.19418303039334  | c  |
| -12.31723785580189 | -1.33124237576697  | -3.81298602826709  | c  |
| -7.58488583038511  | -1.79781244139128  | -6.05594955050423  | c  |
| -10.59264772657551 | 0.65304652100808   | -3.71276735096184  | c  |
| -8.17939806939267  | 0.46272339861967   | -4.81019230262172  | c  |
| -3.59061755459760  | -5.04206620184753  | -11.68765303202173 | c  |
| -3.76369666442265  | -6.19418303039334  | -9.31617510398146  | c  |

|                    |                    |                    |   |
|--------------------|--------------------|--------------------|---|
| -1.33124237576697  | -3.81298602826709  | -12.31723785580189 | c |
| -1.79781244139128  | -6.05594955050423  | -7.58488583038511  | c |
| 0.65304652100808   | -3.71276735096184  | -10.59264772657551 | c |
| 0.46272339861967   | -4.81019230262172  | -8.17939806939267  | c |
| 11.68765303202173  | 3.59061755459760   | -5.04206620184753  | c |
| 9.31617510398146   | 3.76369666442265   | -6.19418303039334  | c |
| 12.31723785580189  | 1.33124237576697   | -3.81298602826709  | c |
| 7.58488583038511   | 1.79781244139128   | -6.05594955050423  | c |
| 10.59264772657551  | -0.65304652100808  | -3.71276735096184  | c |
| 8.17939806939267   | -0.46272339861967  | -4.81019230262172  | c |
| 5.04206620184753   | -11.68765303202173 | 3.59061755459760   | c |
| 6.19418303039334   | -9.31617510398146  | 3.76369666442265   | c |
| 3.81298602826709   | -12.31723785580189 | 1.33124237576698   | c |
| 6.05594955050423   | -7.58488583038511  | 1.79781244139128   | c |
| 3.71276735096184   | -10.59264772657551 | -0.65304652100808  | c |
| 4.81019230262172   | -8.17939806939267  | -0.46272339861967  | c |
| -6.32172977173247  | -2.55730125277430  | 4.67281052381252   | c |
| -2.55730125277430  | -4.67281052381252  | 6.32172977173247   | c |
| -4.67281052381252  | -6.32172977173247  | 2.55730125277430   | c |
| -4.67281052381252  | 6.32172977173247   | -2.55730125277430  | c |
| -6.32172977173247  | 2.55730125277430   | -4.67281052381252  | c |
| -2.55730125277430  | 4.67281052381252   | -6.32172977173247  | c |
| 6.32172977173247   | -2.55730125277430  | -4.67281052381252  | c |
| 2.55730125277430   | -4.67281052381252  | -6.32172977173247  | c |
| 4.67281052381252   | -6.32172977173247  | -2.55730125277430  | c |
| 6.32172977173247   | 2.55730125277430   | 4.67281052381252   | c |
| 2.55730125277430   | 4.67281052381252   | 6.32172977173247   | c |
| 4.67281052381252   | 6.32172977173247   | 2.55730125277430   | c |
| -2.95739322557509  | -14.18656629967717 | -1.09660623358832  | h |
| -7.24744830744858  | -8.82314268669398  | -5.47062254867681  | h |
| -2.77272112172508  | -11.15289907148099 | 2.40225878421253   | h |
| -6.93594486267609  | -5.73652921343394  | -2.06229297592215  | h |
| -8.82314268669398  | 5.47062254867681   | 7.24744830744858   | h |
| -14.18656629967729 | 1.09660623358832   | 2.95739322557509   | h |
| -5.73652921343394  | 2.06229297592215   | 6.93594486267609   | h |
| -11.15289907148099 | -2.40225878421253  | 2.77272112172508   | h |
| 1.09660623358832   | -2.95739322557509  | 14.18656629967729  | h |
| 5.47062254867681   | -7.24744830744858  | 8.82314268669398   | h |
| -2.40225878421253  | -2.77272112172508  | 11.15289907148099  | h |
| 2.06229297592215   | -6.93594486267609  | 5.73652921343394   | h |
| -5.47062254867681  | 7.24744830744858   | 8.82314268669398   | h |
| -1.09660623358832  | 2.95739322557509   | 14.18656629967729  | h |
| -2.06229297592215  | 6.93594486267609   | 5.73652921343394   | h |
| 2.40225878421253   | 2.77272112172508   | 11.15289907148099  | h |
| 8.82314268669398   | -5.47062254867681  | 7.24744830744858   | h |
| 14.18656629967729  | -1.09660623358832  | 2.95739322557509   | h |
| 5.73652921343394   | -2.06229297592215  | 6.93594486267609   | h |
| 11.15289907148099  | 2.40225878421253   | 2.77272112172508   | h |
| 7.24744830744858   | 8.82314268669398   | -5.47062254867681  | h |
| 2.95739322557509   | 14.18656629967717  | -1.09660623358832  | h |
| 6.93594486267609   | 5.73652921343394   | -2.06229297592215  | h |
| 2.77272112172508   | 11.15289907148099  | 2.40225878421253   | h |
| 5.47062254867681   | 7.24744830744858   | -8.82314268669398  | h |
| 1.09660623358832   | 2.95739322557509   | -14.18656629967729 | h |
| 2.06229297592215   | 6.93594486267609   | -5.73652921343394  | h |
| -2.40225878421253  | 2.77272112172508   | -11.15289907148099 | h |
| -7.24744830744858  | 8.82314268669398   | 5.47062254867681   | h |
| -2.95739322557509  | 14.18656629967729  | 1.09660623358832   | h |
| -6.93594486267609  | 5.73652921343394   | 2.06229297592215   | h |
| -2.77272112172508  | 11.15289907148099  | -2.40225878421253  | h |
| -8.82314268669398  | -5.47062254867681  | -7.24744830744858  | h |
| -14.18656629967729 | -1.09660623358832  | -2.95739322557509  | h |
| -5.73652921343394  | -2.06229297592215  | -6.93594486267609  | h |
| -11.15289907148099 | 2.40225878421253   | -2.77272112172508  | h |
| -5.47062254867681  | -7.24744830744858  | -8.82314268669398  | h |
| -1.09660623358832  | -2.95739322557509  | -14.18656629967729 | h |
| -2.06229297592215  | -6.93594486267609  | -5.73652921343394  | h |
| 2.40225878421253   | 2.77272112172508   | -11.15289907148099 | h |
| 8.82314268669398   | 5.47062254867681   | -7.24744830744858  | h |
| 14.18656629967729  | 1.09660623358832   | -2.95739322557509  | h |
| 5.73652921343394   | 2.06229297592215   | -6.93594486267609  | h |
| 11.15289907148099  | -2.40225878421253  | -2.77272112172508  | h |
| 7.24744830744858   | -8.82314268669398  | 5.47062254867681   | h |
| 2.95739322557509   | -14.18656629967729 | 1.09660623358832   | h |
| 6.93594486267609   | -5.73652921343394  | 2.06229297592215   | h |
| 2.77272112172508   | -2.40225878421253  | -2.77272112172508  | h |
| 8.82314268669398   | -8.82314268669398  | 5.47062254867681   | h |
| 14.18656629967729  | -14.18656629967729 | 1.09660623358832   | h |
| 5.73652921343394   | -5.73652921343394  | 2.06229297592215   | h |
| 11.15289907148099  | -11.15289907148099 | -2.40225878421253  | h |
| 7.24744830744858   | -8.82314268669398  | 5.47062254867681   | h |
| 2.95739322557509   | -14.18656629967729 | 1.09660623358832   | h |
| 6.93594486267609   | -5.73652921343394  | 2.06229297592215   | h |
| 2.77272112172508   | -2.40225878421253  | -2.40225878421253  | h |
| -6.44861429560945  | -4.36582265916041  | 2.74689908885808   | c |

|                    |                    |                    |   |
|--------------------|--------------------|--------------------|---|
| -4.36582265916041  | -2.74689908885808  | 6.44861429560945   | c |
| -2.74689908885808  | -6.44861429560941  | 4.36582265916041   | c |
| -4.36582265916041  | 2.74689908885808   | -6.44861429560945  | c |
| 2.74689908885808   | -6.44861429560945  | -4.36582265916041  | c |
| 4.36582265916041   | -2.74689908885808  | -6.44861429560945  | c |
| 2.74689908885808   | 6.44861429560941   | 4.36582265916041   | c |
| 4.36582265916041   | 2.74689908885808   | 6.44861429560945   | c |
| -2.74689908885808  | 6.44861429560945   | -4.36582265916041  | c |
| 6.44861429560941   | 4.36582265916041   | 2.74689908885808   | c |
| -6.44861429560941  | 4.36582265916041   | -2.74689908885808  | c |
| 6.44861429560945   | -4.36582265916041  | -2.74689908885808  | c |
| 4.24594687954896   | -1.35277334401410  | -7.96346490469414  | h |
| 7.96346490469414   | -4.24594687954896  | -1.35277334401410  | h |
| 1.35277334401408   | -7.96346490469414  | -4.24594687954896  | h |
| -1.35277334401410  | -7.96346490469414  | 4.24594687954896   | h |
| -7.96346490469414  | -4.24594687954896  | 1.35277334401410   | h |
| -4.24594687954896  | -1.35277334401410  | 7.96346490469414   | h |
| 4.24594687954896   | 1.35277334401410   | 7.96346490469414   | h |
| 7.96346490469414   | 4.24594687954896   | 1.35277334401410   | h |
| 1.35277334401410   | 7.96346490469414   | 4.24594687954896   | h |
| -4.24594687954896  | 1.35277334401410   | -7.96346490469414  | h |
| -1.35277334401408  | 7.96346490469414   | -4.24594687954896  | h |
| -7.96346490469414  | 4.24594687954896   | -1.35277334401410  | h |
| -7.86544487861641  | -1.99745854437807  | -13.05965438263838 | c |
| -6.49963309619870  | 0.25434196358701   | -13.36251262702679 | c |
| -10.33698693921160 | -1.89728034506716  | -12.12530340405521 | c |
| -7.58226815783229  | 2.56104634584348   | -12.70908521599581 | c |
| -4.57985414780304  | 0.20217817306868   | -14.13163656641852 | h |
| -11.41429218556313 | 0.41669957448571   | -11.46408272138441 | c |
| -11.42244075411694 | -3.64364193110511  | -11.89133976201009 | h |
| -10.03819183263422 | 2.64248087442041   | -11.74137004683750 | c |
| -6.50949629506047  | 4.31140348678832   | -12.95733534740081 | h |
| -13.34342542058703 | 0.47155159024165   | -10.72300402197215 | h |
| -10.88272092369152 | 4.45611133592750   | -11.22097104296300 | h |
| -5.20456538574746  | -4.91859902608970  | -16.93332534525810 | c |
| -6.16940476226142  | -3.21062939480234  | -18.70719875111297 | c |
| -3.40478310406477  | -6.71638087479363  | -17.68108847973400 | c |
| -5.31756863466777  | -3.28664091908185  | -21.20152109528822 | c |
| -7.5989999277313   | -1.82361997497173  | -18.15407262915012 | h |
| -2.55712879528747  | -6.77733396779409  | -20.17017029960294 | c |
| -2.67037885194888  | -8.08331035129631  | -16.30965467012050 | h |
| -3.51294697977221  | -5.06080714341443  | -21.93339972260438 | c |
| -6.08388673278963  | -1.95543426878226  | -22.58456382858501 | h |
| -1.15787383173590  | -8.18489295264061  | -20.74771282524152 | h |
| -2.85855880704343  | -5.12192283646248  | -23.89326481117183 | h |
| -13.05965438263838 | -7.86544487861642  | -1.99745854437807  | c |
| -13.36251262702679 | -6.49963309619870  | 0.25434196358701   | c |
| -12.12530340405521 | -10.33698693921160 | -1.89728034506716  | c |
| -12.70908521599581 | -7.58226815783229  | 2.56104634584348   | c |
| -14.13163656641852 | -4.57985414780304  | 0.20217817306868   | h |
| -11.46408272138441 | -11.41429218556313 | 0.41669957448571   | c |
| -11.89133976201009 | -11.42244075411694 | -3.64364193110511  | c |
| -11.74137004683750 | -10.03819183263422 | 2.64248087442040   | c |
| -12.95733534740081 | -6.50949629506047  | 4.31140348678832   | h |
| -10.72300402197215 | -13.34342542058703 | 0.47155159024165   | h |
| -11.22097104296300 | -10.88272092369152 | 4.45611133592750   | h |
| -16.93332534525810 | -5.20456538574746  | -4.91859902608970  | c |
| -17.68108847973400 | -3.40478310406477  | -6.71638087479363  | c |
| -18.70719875111297 | -6.16940476226142  | -3.21062939480234  | c |
| -20.17017029960294 | -2.55712879528747  | -6.77733396779409  | c |
| -16.30965467012050 | -2.67037885194888  | -8.08331035129631  | h |
| -21.20152109528822 | -5.31756863466777  | -3.28664091908185  | c |
| -18.15407262915012 | -7.5989999277313   | -1.82361997497173  | h |
| -21.93339972260438 | -3.51294697977221  | -5.06080714341443  | c |
| -20.74771282524152 | -1.15787383173590  | -8.18489295264061  | h |
| -22.58456382858501 | -6.08388673278964  | -1.95543426878226  | h |
| -23.89326481117183 | -2.85855880704343  | -5.12192283646248  | h |
| -4.91859902608970  | -16.93332534525810 | -5.20456538574746  | c |
| -3.21062939480234  | -18.70719875111297 | -6.16940476226142  | c |
| -6.71638087479363  | -17.68108847973400 | -3.40478310406477  | c |
| -3.28664091908185  | -21.20152109528822 | -5.31756863466777  | c |
| -1.82361997497173  | -18.15407262915012 | -7.5989999277313   | h |
| -6.77733396779409  | -20.17017029960294 | -2.55712879528747  | c |
| -8.08331035129631  | -16.30965467012050 | -2.67037885194888  | h |
| -5.06080714341443  | -21.93339972260438 | -3.51294697977221  | c |
| -1.95543426878226  | -22.58456382858490 | -6.08388673278964  | h |
| -8.18489295264061  | -20.74771282524152 | -1.15787383173590  | h |

|                   |                    |                    |   |
|-------------------|--------------------|--------------------|---|
| -5.12192283646248 | -23.89326481117183 | -2.85855880704343  | h |
| -1.99745854437807 | -13.05965438263838 | -7.86544487861642  | c |
| 0.25434196358701  | -13.36251262702679 | -6.49963309619870  | c |
| -1.89728034506716 | -12.12530340405524 | -10.33698693921160 | c |
| 2.56104634584348  | -12.70908521599581 | -7.58226815783229  | c |
| 0.20217817306868  | -14.13163656641852 | -4.57985414780304  | h |
| 0.41669957448571  | -11.46408272138441 | -11.41429218556313 | c |
| -3.64364193110511 | -11.89133976201009 | -11.42244075411694 | h |
| 2.64248087442041  | -11.74137004683750 | -10.03819183263422 | c |
| 4.31140348678832  | -12.95733534740081 | -6.50949629506047  | h |
| 0.47155159024165  | -10.72300402197215 | -13.34342542058703 | h |
| 4.45611133592750  | -11.22097104296300 | -10.88272092369152 | h |
| 7.86544487861642  | -1.99745854437807  | 13.05965438263838  | c |
| 6.49963309619870  | 0.25434196358701   | 13.36251262702679  | c |
| 10.33698693921160 | -1.89728034506716  | 12.12530340405523  | c |
| 7.58226815783235  | 2.56104634584348   | 12.70908521599581  | c |
| 4.57985414780304  | 0.20217817306868   | 14.13163656641852  | h |
| 11.41429218556313 | 0.41669957448571   | 11.46408272138441  | c |
| 11.42244075411694 | -3.64364193110511  | 11.89133976201009  | h |
| 10.03819183263422 | 2.64248087442040   | 11.74137004683750  | c |
| 6.50949629506043  | 4.31140348678832   | 12.95733534740081  | h |
| 13.34342542058703 | 0.47155159024165   | 10.72300402197215  | h |
| 10.88272092369152 | 4.45611133592750   | 11.22097104296300  | h |
| 5.20456538574750  | -4.91859902608970  | 16.92332534525810  | c |
| 3.40478310406477  | -6.71638087479363  | 17.68108847973400  | c |
| 6.16940476226142  | -3.21062939480234  | 18.70719875111297  | c |
| 2.55712879528747  | -6.77733396779409  | 20.17017029960294  | c |
| 2.67037885194888  | -8.08331035129631  | 16.30965467012050  | h |
| 5.31756863466777  | -3.28664091908185  | 21.20152109528822  | c |
| 7.5989999277313   | -1.82361997497173  | 18.15407262915012  | h |
| 3.51294697977221  | -5.06080714341443  | 21.93339972260438  | c |
| 1.15787383173588  | -8.18489295264061  | 20.74771282524152  | h |
| 6.08388673278964  | -1.95543426878226  | 22.58456382858501  | h |
| 2.85855880704345  | -5.12192283646248  | 23.89326481117183  | h |
| 16.93332534525810 | -5.20456538574750  | 4.91859902608970   | c |
| 18.70719875111297 | -6.16940476226142  | 3.21062939480234   | c |
| 17.68108847973400 | -3.40478310406477  | 6.71638087479363   | c |
| 21.20152109528822 | -5.31756863466777  | 3.28664091908185   | c |
| 18.15407262915012 | -7.5989999277313   | 1.82361997497173   | h |
| 20.17017029960294 | -2.55712879528747  | 6.77733396779409   | c |
| 16.30965467012050 | -2.67037885194890  | 8.08331035129631   | h |
| 21.93339972260438 | -3.51294697977221  | 5.06080714341443   | c |
| 22.58456382858501 | -6.08388673278964  | 1.95543426878226   | h |
| 20.74771282524152 | -1.15787383173588  | 8.18489295264061   | h |
| 23.89326481117183 | -2.85855880704345  | 5.12192283646248   | h |
| 13.05965438263838 | -7.86544487861642  | 1.99745854437807   | c |
| 13.36251262702679 | -6.49963309619870  | -0.25434196358701  | c |
| 12.12530340405521 | -10.33698693921160 | 1.89728034506716   | c |
| 12.70908521599581 | -7.58226815783229  | -2.56104634584348  | c |
| 14.13163656641852 | -4.57985414780304  | -0.20217817306868  | h |
| 11.46408272138441 | -11.41429218556313 | -0.41669957448571  | c |
| 11.89133976201009 | -11.42244075411694 | 3.64364193110511   | c |
| 11.74137004683750 | -10.03819183263422 | -2.64248087442040  | c |
| 12.95733534740081 | -6.50949629506047  | -4.31140348678832  | h |
| 10.72300402197215 | -13.34342542058703 | -0.47155159024165  | h |
| 11.22097104296300 | -10.88272092369152 | -4.45611133592750  | h |
| 4.91859902608970  | -16.93332534525810 | 5.20456538574750   | c |
| 3.21062939480234  | -18.70719875111297 | 6.16940476226142   | c |
| 6.71638087479363  | -17.68108847973400 | 3.40478310406477   | c |
| 3.28664091908185  | -21.20152109528822 | 5.31756863466777   | c |
| 1.82361997497173  | -18.15407262915012 | 7.5989999277313    | h |
| 6.77733396779409  | -20.17017029960294 | 2.55712879528747   | c |
| 8.08331035129631  | -16.30965467012050 | 2.67037885194888   | h |
| 5.06080714341443  | -21.93339972260438 | 3.51294697977221   | c |
| 1.95543426878226  | -22.58456382858501 | 6.08388673278964   | h |
| 8.18489295264061  | -20.74771282524152 | 1.15787383173590   | h |
| 5.12192283646248  | -23.89326481117183 | 2.85855880704345   | h |
| 1.99745854437807  | -13.05965438263838 | 7.86544487861642   | c |
| -0.25434196358701 | -13.36251262702679 | 6.49963309619870   | c |
| 1.89728034506716  | -12.12530340405523 | 10.33698693921160  | c |
| -2.56104634584348 | -12.70908521599581 | 7.58226815783229   | c |
| -0.20217817306868 | -14.13163656641852 | 4.57985414780304   | h |
| -0.41669957448571 | -11.46408272138441 | 11.41429218556313  | c |
| 3.64364193110511  | -11.89133976201009 | 11.42244075411694  | h |
| -2.64248087442040 | -11.74137004683750 | 10.03819183263422  | c |
| -4.31140348678832 | -12.95733534740081 | 6.50949629506043   | h |
| -0.47155159024165 | -10.72300402197215 | 13.34342542058703  | h |



|                    |                    |                    |   |
|--------------------|--------------------|--------------------|---|
| -4.45611133592750  | -11.22097104296300 | 10.88272092369152  | h |
| 13.05965438263838  | 7.86544487861642   | -1.99745854437807  | c |
| 13.36251262702679  | 6.49963309619870   | 0.25434196358701   | c |
| 12.12530340405521  | 10.33698693921160  | -1.89728034506716  | c |
| 12.70908521599581  | 7.58226815783229   | 2.56104634584348   | c |
| 14.13163656641852  | 4.57985414780304   | 0.20217817306868   | h |
| 11.46408272138441  | 11.41429218556313  | 0.41669957448571   | c |
| 11.89133976201009  | 11.42244075411694  | -3.64364193110511  | h |
| 11.74137004683754  | 10.03819183263422  | 2.64248087442040   | c |
| 12.95733534740081  | 6.50949629506043   | 4.31140348678832   | h |
| 10.72300402197215  | 13.34342542058703  | 0.47155159024165   | h |
| 11.22097104296312  | 10.88272092369152  | 4.45611133592750   | h |
| 16.93332534525810  | 5.20456538574746   | -4.91859902608970  | c |
| 17.68108847973400  | 3.40478310406477   | -6.71638087479363  | c |
| 18.70719875111297  | 6.16940476226142   | -3.21062939480234  | c |
| 20.17017029960294  | 2.55712879528747   | -6.77733396779409  | c |
| 16.30965467012050  | 2.67037885194888   | -8.08331035129631  | h |
| 21.20152109528822  | 5.31756863466777   | -3.28664091908185  | c |
| 18.15407262915012  | 7.59899999277313   | -1.82361997497173  | h |
| 21.93339972260438  | 3.51294697977221   | -5.06080714341443  | c |
| 20.74771282524152  | 1.15787383173588   | -8.18489295264061  | h |
| 22.58456382858501  | 6.08388673278964   | -1.95543426878226  | h |
| 23.89326481117183  | 2.85855880704343   | -5.12192283646248  | h |
| 4.91859902608970   | 16.93332534525810  | -5.20456538574750  | c |
| 3.21062939480234   | 18.70719875111297  | -6.16940476226142  | c |
| 6.71638087479363   | 17.68108847973400  | -3.40478310406477  | c |
| 3.28664091908185   | 21.20152109528822  | -5.31756863466777  | c |
| 1.82361997497173   | 18.15407262915012  | -7.59899999277313  | h |
| 6.77733396779409   | 20.17017029960294  | -2.55712879528747  | c |
| 8.08331035129631   | 16.30965467012050  | -2.67037885194888  | h |
| 5.06080714341443   | 21.93339972260438  | -3.51294697977221  | c |
| 1.95543426878226   | 22.58456382858490  | -6.08388673278964  | h |
| 8.18489295264061   | 20.74771282524152  | -1.15787383173588  | h |
| 5.12192283646248   | 23.89326481117183  | -2.85855880704343  | h |
| 1.99745854437807   | 13.05965438263838  | -7.86544487861642  | c |
| -0.25434196358701  | 13.36251262702679  | -6.49963309619870  | c |
| 1.89728034506716   | 12.12530340405524  | -10.33698693921160 | c |
| -2.56104634584348  | 12.70908521599581  | -7.58226815783229  | c |
| -0.20217817306868  | 14.13163656641852  | -4.57985414780304  | h |
| -0.41669957448571  | 11.46408272138441  | -11.41429218556313 | c |
| 3.64364193110511   | 11.89133976201009  | -11.42244075411694 | h |
| -2.64248087442041  | 11.74137004683750  | -10.03819183263422 | c |
| -4.31140348678832  | 12.95733534740081  | -6.50949629506047  | h |
| -0.47155159024165  | 10.72300402197215  | -13.34342542058703 | h |
| -4.45611133592750  | 11.22097104296300  | -10.88272092369152 | h |
| 7.86544487861642   | 1.99745854437807   | -13.05965438263838 | c |
| 6.49963309619870   | -0.25434196358701  | -13.36251262702679 | c |
| 10.33698693921160  | 1.89728034506716   | -12.12530340405523 | c |
| 7.58226815783229   | -2.56104634584348  | -12.70908521599581 | c |
| 4.57985414780304   | -0.20217817306868  | -14.13163656641852 | h |
| 11.41429218556313  | -0.41669957448571  | -11.46408272138441 | c |
| 11.42244075411694  | 3.64364193110511   | -11.89133976201009 | h |
| 10.03819183263422  | -2.64248087442040  | -11.74137004683750 | c |
| 6.50949629506043   | -4.31140348678832  | -12.95733534740081 | h |
| 13.34342542058703  | -0.47155159024165  | -10.72300402197215 | h |
| 10.88272092369152  | -4.45611133592750  | -11.22097104296300 | h |
| 5.20456538574746   | 4.91859902608970   | -16.93332534525810 | c |
| 3.40478310406477   | 6.71638087479363   | -17.68108847973400 | c |
| 6.16940476226142   | 3.21062939480234   | -18.70719875111297 | c |
| 2.55712879528747   | 6.77733396779409   | -20.17017029960294 | c |
| 2.67037885194888   | 8.08331035129631   | -16.30965467012050 | h |
| 5.31756863466777   | 3.28664091908185   | -21.20152109528822 | c |
| 7.59899999277313   | 1.82361997497173   | -18.15407262915012 | h |
| 3.51294697977221   | 5.06080714341443   | -21.93339972260438 | c |
| 1.15787383173590   | 8.18489295264061   | -20.74771282524152 | h |
| 6.08388673278963   | 1.95543426878226   | -22.58456382858501 | h |
| 2.85855880704345   | 5.12192283646248   | -23.89326481117183 | h |
| -7.86544487861642  | 1.99745854437807   | 13.05965438263838  | c |
| -6.49963309619870  | -0.25434196358701  | 13.36251262702679  | c |
| -10.33698693921160 | 1.89728034506716   | 12.12530340405521  | c |
| -7.58226815783235  | -2.56104634584348  | 12.70908521599581  | c |
| -4.57985414780304  | -0.20217817306868  | 14.13163656641852  | h |
| -11.41429218556313 | -0.41669957448571  | 11.46408272138441  | c |
| -11.42244075411694 | 3.64364193110511   | 11.89133976201009  | h |
| -10.03819183263422 | -2.64248087442040  | 11.74137004683750  | c |
| -6.50949629506047  | -4.31140348678832  | 12.95733534740081  | h |
| -13.34342542058703 | -0.47155159024165  | 10.72300402197215  | h |

|                    |                    |                    |   |
|--------------------|--------------------|--------------------|---|
| -10.88272092369152 | -4.45611133592750  | 11.22097104296300  | h |
| -5.20456538574750  | 4.91859902608970   | 16.93332534525810  | c |
| -6.16940476226142  | 3.21062939480234   | 18.70719875111297  | c |
| -3.40478310406477  | 6.71638087479363   | 17.68108847973400  | c |
| -5.31756863466777  | 3.28664091908185   | 21.20152109528822  | c |
| -7.59899999277313  | 1.82361997497173   | 18.15407262915012  | h |
| -2.55712879528747  | 6.77733396779409   | 20.17017029960294  | c |
| -2.67037885194888  | 8.08331035129631   | 16.30965467012050  | h |
| -3.51294697977221  | 5.06080714341443   | 21.93339972260438  | c |
| -6.08388673278964  | 1.95543426878226   | 22.58456382858501  | h |
| -1.15787383173588  | 8.18489295264061   | 20.74771282524152  | h |
| -2.85855880704343  | 5.12192283646248   | 23.89326481117183  | h |
| -4.91859902608970  | 16.93332534525810  | 5.20456538574746   | c |
| -3.21062939480234  | 18.70719875111297  | 6.16940476226142   | c |
| -6.71638087479363  | 6.78108847973400   | 3.40478310406477   | c |
| -3.28664091908185  | 21.20152109528822  | 5.31756863466777   | c |
| -1.82361997497173  | 18.15407262915012  | 7.59899999277313   | h |
| -6.77733396779409  | 20.17017029960294  | 2.55712879528747   | c |
| -8.08331035129631  | 16.30965467012050  | 2.67037885194888   | h |
| -5.06080714341443  | 21.93339972260438  | 3.51294697977221   | c |
| -1.95543426878226  | 22.58456382858501  | 6.08388673278964   | h |
| -8.18489295264061  | 20.74771282524152  | 1.15787383173590   | h |
| -5.12192283646248  | 23.89326481117183  | 2.85855880704345   | h |
| -1.99745854437807  | 13.05965438263838  | 7.86544487861642   | c |
| 0.25434196358701   | 13.36251262702679  | 6.49963309619870   | c |
| -1.89728034506716  | 12.12530340405524  | 10.33698693921160  | c |
| 2.56104634584348   | 12.70908521599581  | 7.58226815783229   | c |
| 0.20217817306868   | 14.13163656641852  | 4.57985414780304   | h |
| 0.41669957448571   | 11.46408272138441  | 11.41429218556313  | c |
| -3.64364193110511  | 11.89133976201009  | 11.42244075411694  | h |
| 2.64248087442040   | 11.74137004683750  | 10.03819183263422  | c |
| 4.31140348678832   | 12.95733534740081  | 6.50949629506043   | h |
| 0.47155159024165   | 10.72300402197215  | 13.34342542058703  | h |
| 4.45611133592750   | 11.22097104296300  | 10.88272092369152  | h |
| -16.93332534525810 | 5.20456538574750   | 4.91859902608970   | c |
| -17.68108847973400 | 3.40478310406477   | 6.71638087479363   | c |
| -18.70719875111297 | 6.16940476226142   | 3.21062939480234   | c |
| -20.17017029960294 | 2.55712879528747   | 6.77733396779409   | c |
| -16.30965467012050 | 2.67037885194888   | 8.08331035129631   | h |
| -21.20152109528822 | 5.31756863466777   | 3.28664091908185   | c |
| -18.15407262915012 | 7.59899999277313   | 1.82361997497173   | h |
| -21.93339972260438 | 3.51294697977221   | 5.06080714341443   | c |
| -20.74771282524152 | 1.15787383173590   | 8.18489295264061   | h |
| -22.58456382858501 | 6.08388673278964   | 1.95543426878226   | h |
| -23.89326481117183 | 2.85855880704345   | 5.12192283646248   | h |
| -13.05965438263838 | 7.86544487861641   | 1.99745854437807   | c |
| -13.36251262702679 | 6.49963309619870   | -0.25434196358701  | c |
| -12.12530340405521 | 10.33698693921160  | 1.89728034506716   | c |
| -12.70908521599581 | 7.58226815783229   | -2.56104634584348  | c |
| -14.13163656641852 | 4.57985414780304   | -0.20217817306868  | h |
| -11.46408272138441 | 11.41429218556313  | -0.41669957448571  | c |
| -11.89133976201009 | 11.42244075411694  | 3.64364193110511   | h |
| -11.74137004683754 | 10.03819183263422  | -2.64248087442040  | c |
| -12.95733534740081 | 6.50949629506043   | -4.31140348678832  | h |
| -10.72300402197215 | 13.34342542058701  | -0.47155159024165  | h |
| -11.22097104296300 | 10.88272092369152  | -4.45611133592750  | h |
| -12.80435170410089 | 12.80435170410089  | 12.80435170410089  | c |
| -11.15652286649730 | 14.18823541451011  | 14.74046019645777  | c |
| -14.18823541451014 | 14.74046019645777  | 11.15652286649730  | c |
| -14.74046019645777 | 11.15652286649730  | 14.18823541451011  | c |
| -10.14783210698381 | 12.82546125076383  | 15.96082421136428  | h |
| -9.73106394616127  | 15.37635310589046  | 13.78191301834478  | h |
| -12.31302435156407 | 15.42010024564780  | 15.96222561729654  | h |
| -15.37635310589048 | 13.78191301834478  | 9.73106394616127   | h |
| -15.42010024564780 | 15.96222561729654  | 12.31302435156407  | h |
| -12.82546125076383 | 15.96082421136428  | 10.14783210698381  | h |
| -15.96222561729654 | 12.31302435156407  | 15.42010024564780  | h |
| -15.96082421136428 | 10.14783210698381  | 12.82546125076383  | h |
| -13.78191301834478 | 9.73106394616127   | 15.37635310589046  | h |
| -12.80435170410089 | -12.80435170410089 | -12.80435170410089 | c |
| -14.18823541451011 | -14.74046019645777 | -11.15652286649730 | c |
| -14.74046019645777 | -11.15652286649730 | -14.18823541451011 | c |
| -11.15652286649730 | -14.18823541451011 | -14.74046019645777 | c |
| -12.82546125076383 | -15.96082421136428 | -10.14783210698381 | h |
| -15.37635310589048 | -13.78191301834478 | -9.73106394616127  | h |
| -15.42010024564780 | -15.96222561729654 | -12.31302435156407 | h |
| -13.78191301834478 | -9.73106394616127  | -15.37635310589048 | h |

|                    |                    |                    |   |
|--------------------|--------------------|--------------------|---|
| -15.96222561729654 | -12.31302435156401 | -15.42010024564780 | h |
| -15.96082421136428 | -10.14783210698381 | -12.82546125076383 | h |
| -12.31302435156407 | -15.42010024564780 | -15.96222561729654 | h |
| -10.14783210698381 | -12.82546125076383 | -15.96082421136428 | h |
| -9.73106394616127  | -15.37635310589048 | -13.78191301834478 | h |
| 12.80435170410089  | -12.80435170410089 | 12.80435170410089  | c |
| 14.74046019645777  | -11.15652286649730 | 14.18823541451011  | c |
| 11.15652286649730  | -14.18823541451011 | 14.74046019645777  | c |
| 14.18823541451014  | -14.74046019645777 | 11.15652286649730  | c |
| 15.96082421136428  | -10.14783210698381 | 12.82546125076383  | h |
| 13.78191301834478  | -9.73106394616127  | 15.37635310589046  | h |
| 15.96222561729654  | -12.31302435156407 | 15.42010024564780  | h |
| 9.73106394616127   | -15.37635310589048 | 13.78191301834478  | h |
| 12.31302435156407  | -15.42010024564780 | 15.96222561729654  | h |
| 10.14783210698381  | -12.82546125076383 | 15.96082421136428  | h |
| 15.42010024564780  | -15.96222561729654 | 12.31302435156407  | h |
| 12.82546125076383  | -15.96082421136428 | 10.14783210698381  | h |
| 15.37635310589046  | -13.78191301834478 | 9.73106394616127   | h |
| 12.80435170410089  | 12.80435170410089  | -12.80435170410089 | c |
| 14.18823541451011  | 14.74046019645777  | -11.15652286649730 | c |
| 14.74046019645777  | 11.15652286649730  | -14.18823541451011 | c |
| 11.15652286649730  | 14.18823541451018  | -14.74046019645777 | c |
| 12.82546125076383  | 15.96082421136428  | -10.14783210698381 | h |
| 15.37635310589046  | 13.78191301834478  | -9.73106394616127  | h |
| 15.42010024564780  | 15.96222561729654  | -12.31302435156407 | h |
| 13.78191301834478  | 9.73106394616127   | -15.37635310589048 | h |
| 15.96222561729654  | 12.31302435156407  | -15.42010024564780 | h |
| 15.96082421136428  | 10.14783210698381  | -12.82546125076383 | h |
| 12.31302435156407  | 15.42010024564780  | -15.96222561729654 | h |
| 10.14783210698381  | 12.82546125076383  | -15.96082421136428 | h |
| 9.73106394616127   | 15.37635310589046  | -13.78191301834478 | h |
